# Supplementary material for: Late middle Miocene caviomorph rodents from Tarapoto, Peruvian Amazonia
Source: PLoS One. 2021 Nov 3;16(11):e0258455. doi: 10.1371/journal.pone.0258455 (PMC8565788; doi:10.1371/journal.pone.0258455)
Supplement: S2 File — (ZIP) [file pone.0258455.s002.zip]

Archive with 100 entries (69 files):
- S2_File/
- S2_File/.DS_Store
- __MACOSX/
- __MACOSX/S2_File/
- __MACOSX/S2_File/._.DS_Store
- S2_File/dp4/
- S2_File/dp4/.DS_Store
- __MACOSX/S2_File/dp4/
- __MACOSX/S2_File/dp4/._.DS_Store
- S2_File/dp4/Script_dp4.txt
- S2_File/dp4/Stat_dp4.txt
- S2_File/dP4s/
- S2_File/dP4s/.DS_Store
- __MACOSX/S2_File/dP4s/
- __MACOSX/S2_File/dP4s/._.DS_Store
- S2_File/dP4s/Script_dP4s.txt
- __MACOSX/S2_File/dP4s/._Script_dP4s.txt
- S2_File/dP4s/Stat_dP4s.txt
- __MACOSX/S2_File/dP4s/._Stat_dP4s.txt
- S2_File/m1-2/
- S2_File/m1-2/.DS_Store
- __MACOSX/S2_File/m1-2/
- __MACOSX/S2_File/m1-2/._.DS_Store
- S2_File/m1-2/.Rapp.history
- S2_File/m1-2/Models/
- S2_File/m1-2/Models/.DS_Store
- __MACOSX/S2_File/m1-2/Models/
- __MACOSX/S2_File/m1-2/Models/._.DS_Store
- S2_File/m1-2/Models/microsMod_m1-2.txt
- __MACOSX/S2_File/m1-2/Models/._microsMod_m1-2.txt
- S2_File/m1-2/Script_m1-2.txt
- __MACOSX/S2_File/m1-2/._Script_m1-2.txt
- S2_File/m1-2/Stat_m1-2.txt
- __MACOSX/S2_File/m1-2/._Stat_m1-2.txt
- S2_File/m1-2/StatesWear/
- S2_File/m1-2/StatesWear/.DS_Store
- __MACOSX/S2_File/m1-2/StatesWear/
- __MACOSX/S2_File/m1-2/StatesWear/._.DS_Store
- S2_File/m1-2/StatesWear/Stat_m1-2_reduced.txt
- __MACOSX/S2_File/m1-2/StatesWear/._Stat_m1-2_reduced.txt
- S2_File/M1-2s/
- S2_File/M1-2s/.DS_Store
- __MACOSX/S2_File/M1-2s/
- __MACOSX/S2_File/M1-2s/._.DS_Store
- S2_File/M1-2s/Models/
- S2_File/M1-2s/Models/.DS_Store
- __MACOSX/S2_File/M1-2s/Models/
- __MACOSX/S2_File/M1-2s/Models/._.DS_Store
- S2_File/M1-2s/Models/microsMod_M1-2s.txt
- __MACOSX/S2_File/M1-2s/Models/._microsMod_M1-2s.txt
- S2_File/M1-2s/Script_M1-2s.txt
- __MACOSX/S2_File/M1-2s/._Script_M1-2s.txt
- S2_File/M1-2s/Stat_M1-2s.txt
- S2_File/M1-2s/StatesWear/
- S2_File/M1-2s/StatesWear/Stat_M1-2s_reduced.txt
- __MACOSX/S2_File/M1-2s/StatesWear/
- __MACOSX/S2_File/M1-2s/StatesWear/._Stat_M1-2s_reduced.txt
- S2_File/m3/
- S2_File/m3/.DS_Store
- __MACOSX/S2_File/m3/
- __MACOSX/S2_File/m3/._.DS_Store
- S2_File/m3/Script_m3.txt
- __MACOSX/S2_File/m3/._Script_m3.txt
- S2_File/m3/Stat_m3.txt
- __MACOSX/S2_File/m3/._Stat_m3.txt
- S2_File/M3s/
- S2_File/M3s/.DS_Store
- __MACOSX/S2_File/M3s/
- __MACOSX/S2_File/M3s/._.DS_Store
- S2_File/M3s/Script_M3s.txt
- __MACOSX/S2_File/M3s/._Script_M3s.txt
- S2_File/M3s/Stat_M3s.txt
- __MACOSX/S2_File/M3s/._Stat_M3s.txt
- S2_File/p4/
- S2_File/p4/.DS_Store
- __MACOSX/S2_File/p4/
- __MACOSX/S2_File/p4/._.DS_Store
- S2_File/p4/.Rapp.history
- S2_File/p4/Models/
- S2_File/p4/Models/.DS_Store
- __MACOSX/S2_File/p4/Models/
- __MACOSX/S2_File/p4/Models/._.DS_Store
- S2_File/p4/Models/microsMod_p4.txt
- __MACOSX/S2_File/p4/Models/._microsMod_p4.txt
- S2_File/p4/Script_p4.txt
- __MACOSX/S2_File/p4/._Script_p4.txt
- S2_File/p4/Stat_p4.txt
- __MACOSX/S2_File/p4/._Stat_p4.txt
- S2_File/p4/StatesWear/
- S2_File/p4/StatesWear/Stat_p4_reduced.txt
- __MACOSX/S2_File/p4/StatesWear/
- __MACOSX/S2_File/p4/StatesWear/._Stat_p4_reduced.txt
- S2_File/P4s/
- S2_File/P4s/.DS_Store
- __MACOSX/S2_File/P4s/
- __MACOSX/S2_File/P4s/._.DS_Store
- S2_File/P4s/Script_P4s.txt
- __MACOSX/S2_File/P4s/._Script_P4s.txt
- S2_File/P4s/Stat_P4s.txt
- __MACOSX/S2_File/P4s/._Stat_P4s.txt
