# Supplementary material for: Late middle Miocene caviomorph rodents from Tarapoto, Peruvian Amazonia
Source: PLoS One. 2021 Nov 3;16(11):e0258455. doi: 10.1371/journal.pone.0258455 (PMC8565788; doi:10.1371/journal.pone.0258455)
Supplement: S2 File — (ZIP) [file pone.0258455.s002.zip › S2_File/dp4/Script_dp4.txt]

library("cluster")

setwd("E:/Recherche/Publis/Boivin&al,202X_TAR-31&La Venta/Stat/Tout/dp4")
micros<-read.table("Stat_dp4.txt", header=T, dec=",", sep= "\t")

summary(micros[,3])
summary(micros[,4])
var(micros[,3])
var(micros[,4])
sd(micros[,3])
sd(micros[,4])

stripchart(micros$len, vertical=T)
stripchart(micros$wid, vertical=T)
hist(micros$len, probability=F)
hist(micros$wid, probability=F)
boxplot(micros$len)
boxplot(micros$wid)
plot(micros[,3],micros[,4],pch=21,cex=2)
panel.smooth(micros[,3],micros[,4])

shapiro.test(micros$len)
shapiro.test(micros$wid)

cor.test(micros$len,micros$wid,method="pearson",use="pairwise.complete.obs")

al<-vector(mode="numeric")
projlen<-micros$len
for(i in 2:5)
{ml<-kmeans(projlen,i)
al<-append(al,ml$betweenss)}
plot(2:5,al)
aw<-vector(mode="numeric")
projwid<-micros$wid
for(i in 2:5)
{mw<-kmeans(projwid,i)
aw<-append(aw,mw$betweenss)}
plot(2:5,aw)
projlen<-micros$len
projwid<-micros$wid
Dl<-dist(projlen, method="euclidian")
Dw<-dist(projwid, method="euclidian")
mod1lenk<-kmeans(projlen,2)
mod1widk<-kmeans(projwid,2)
microsMod<-cbind(micros,mod1lenk$cluster)
mod1lenp<-pam(Dl, 2)
mod1widp<-pam(Dw, 2)
microsMod<-cbind(microsMod,mod1lenp$clustering)
microsMod<-cbind(microsMod,mod1widk$cluster)
microsMod<-cbind(microsMod,mod1widp$clustering)
mod2lenk<-kmeans(projlen,3)
mod2widk<-kmeans(projwid,3)
microsMod<-cbind(microsMod,mod2lenk$cluster)
mod2lenp<-pam(Dl, 3)
mod2widp<-pam(Dw, 3)
microsMod<-cbind(microsMod,mod2lenp$clustering)
microsMod<-cbind(microsMod,mod2widk$cluster)
microsMod<-cbind(microsMod,mod2widp$clustering)
mod3lenk<-kmeans(projlen,4)
mod3widk<-kmeans(projwid,4)
microsMod<-cbind(microsMod,mod3lenk$cluster)
mod3lenp<-pam(Dl, 4)
mod3widp<-pam(Dw, 4)
microsMod<-cbind(microsMod,mod3lenp$clustering)
microsMod<-cbind(microsMod,mod3widk$cluster)
microsMod<-cbind(microsMod,mod3widp$clustering)
mod4lenk<-kmeans(projlen,5)
mod4widk<-kmeans(projwid,5)
microsMod<-cbind(microsMod,mod4lenk$cluster)
mod4lenp<-pam(Dl, 5)
mod4widp<-pam(Dw, 5)
microsMod<-cbind(microsMod,mod4lenp$clustering)
microsMod<-cbind(microsMod,mod4widk$cluster)
microsMod<-cbind(microsMod,mod4widp$clustering)
write.csv(microsMod, file="microsModPartition.txt")
