# Supplementary material for: Late middle Miocene caviomorph rodents from Tarapoto, Peruvian Amazonia
Source: PLoS One. 2021 Nov 3;16(11):e0258455. doi: 10.1371/journal.pone.0258455 (PMC8565788; doi:10.1371/journal.pone.0258455)
Supplement: S2 File — (ZIP) [file pone.0258455.s002.zip › S2_File/dp4/Stat_dp4.txt]

Numero	Loci	len	wid	Hlin	Hlab	Locality	Species
129	l dp4	1,8	1,032	0,677	0,698	TAR-31	Microscleromys
137	l dp4	1,967	1,136	NA	NA	TAR-31	Microscleromys
138	l dp4	1,854	1,338	NA	NA	TAR-31	Microscleromys
139	l dp4	2,236	1,295	0,846	0,837	TAR-31	Microscleromys
142	l dp4	2,014	1,271	0,598	0,794	TAR-31	Microscleromys
144	r dp4	1,824	1,188	NA	NA	TAR-31	Microscleromys
145	r dp4	1,991	1,195	NA	NA	TAR-31	Microscleromys
