# Supplementary material for: Late middle Miocene caviomorph rodents from Tarapoto, Peruvian Amazonia
Source: PLoS One. 2021 Nov 3;16(11):e0258455. doi: 10.1371/journal.pone.0258455 (PMC8565788; doi:10.1371/journal.pone.0258455)
Supplement: S2 File — (ZIP) [file pone.0258455.s002.zip › S2_File/dP4s/Script_dP4s.txt]

install.packages("trend")
install.packages("RVAideMemoire")
install.packages("cluster")
library("trend")
library("RVAideMemoire")
library("cluster")

setwd("E:/Recherche/Publis/Boivin&al,202X_TAR-31&La Venta/Stat/Tout/dP4s")
micros<-read.table("Stat_dP4s.txt", header=T, dec=",", sep= "\t")

TAR31<-micros[micros[,7]=="TAR-31",]
LV<-micros[micros[,7]=="La_Venta",]
Mc<-micros[micros[,8]=="Microscleromys cribriphilus",]

summary(micros[,3])
summary(TAR31[,3])
summary(LV[,3])
summary(Mc[,3])
summary(micros[,4])
summary(TAR31[,4])
summary(LV[,4])
summary(Mc[,4])
var(micros[,3])
var(TAR31[,3])
var(LV[,3])
var(Mc[,3])
var(micros[,4])
var(TAR31[,4])
var(LV[,4])
var(Mc[,4])
sd(micros[,3])
sd(TAR31[,3])
sd(LV[,3])
sd(Mc[,3])
sd(micros[,4])
sd(TAR31[,4])
sd(LV[,4])
sd(Mc[,4])

stripchart(micros$len, vertical=T)
stripchart(micros$wid, vertical=T)
stripchart(micros$len~micros$Locality, vertical=T, names=c("TAR-31","La_Venta"))
stripchart(micros$wid~micros$Locality, vertical=T, names=c("TAR-31","La_Venta"))
hist(micros$len, probability=F)
hist(micros$wid, probability=F)
boxplot(micros$len)
boxplot(micros$wid)
boxplot(micros$len~micros$Locality, labels=c("TAR-31","La_Venta"))
boxplot(micros$wid~micros$Locality, labels=c("TAR-31","La_Venta"))
mlen31<-mean(micros$len[micros$Locality=="TAR-31"])
sdlen31<-sd(micros$len[micros$Locality=="TAR-31"])
mlenLV<-mean(micros$len[micros$Locality=="La_Venta"])
sdlenLV<-sd(micros$len[micros$Locality=="La_Venta"])
moylenGis<-c(mlen31, mlenLV)
sdlenGis<-c(sdlen31, sdlenLV)
abscisses<-barplot(moylenGis)
segments(abscisses,moylenGis-sdlenGis,abscisses,moylenGis+sdlenGis)
segments(abscisses-0.1,moylenGis-sdlenGis,abscisses+0.1,moylenGis-sdlenGis)
segments(abscisses-0.1,moylenGis+sdlenGis,abscisses+0.1,moylenGis+sdlenGis)
mwid31<-mean(micros$wid[micros$Locality=="TAR-31"])
sdwid31<-sd(micros$wid[micros$Locality=="TAR-31"])
mwidLV<-mean(micros$wid[micros$Locality=="La_Venta"])
sdwidLV<-sd(micros$wid[micros$Locality=="La_Venta"])
moywidGis<-c(mwid31, mwidLV)
sdwidGis<-c(sdwid31, sdwidLV)
abscisses<-barplot(moywidGis)
segments(abscisses,moywidGis-sdwidGis,abscisses,moywidGis+sdwidGis)
segments(abscisses-0.1,moywidGis-sdwidGis,abscisses+0.1,moywidGis-sdwidGis)
segments(abscisses-0.1,moywidGis+sdwidGis,abscisses+0.1,moywidGis+sdwidGis)
plot(micros[,3],micros[,4],pch=21,cex=2)
panel.smooth(micros[,3],micros[,4])
ColG<-c("blue","green")[as.factor(micros[,7])]
plot(micros[,3],micros[,4],pch=21,cex=2,bg=ColG)

qqnorm(micros$len)
qqnorm(micros$len[micros$Locality=="TAR-31"])
qqnorm(micros$wid)
qqnorm(micros$wid[micros$Locality=="TAR-31"])
shapiro.test(micros$len)
shapiro.test(micros$len[micros$Locality=="TAR-31"])
shapiro.test(micros$len[micros$Locality=="La_Venta"])
shapiro.test(micros$wid)
shapiro.test(micros$wid[micros$Locality=="TAR-31"])
shapiro.test(micros$wid[micros$Locality=="La_Venta"])
micros$wid1<-log(micros$wid)
shapiro.test(micros$wid1)
shapiro.test(micros$wid1[micros$Locality=="TAR-31"])
micros$wid1<-log10(micros$wid)
shapiro.test(micros$wid1)
shapiro.test(micros$wid1[micros$Locality=="TAR-31"])
micros$wid1<-sqrt(micros$wid)
shapiro.test(micros$wid1)
shapiro.test(micros$wid1[micros$Locality=="TAR-31"])
micros$wid1<-1/(micros$wid)
shapiro.test(micros$wid1)
shapiro.test(micros$wid1[micros$Locality=="TAR-31"])
shapiro.test(micros$wid1[micros$Locality=="La_Venta"])

var.test(micros$len~micros$Locality)
perm.var.test(micros$wid[micros$Locality=="TAR-31"], micros$wid[micros$Locality=="La_Venta"])
var.test(micros$wid1~micros$Locality)

bartels.test(micros$len)
bartels.test(micros$len[micros$Locality=="TAR-31"])
bartels.test(micros$wid)
bartels.test(micros$wid[micros$Locality=="TAR-31"])
bartels.test(micros$wid1)
bartels.test(micros$wid1[micros$Locality=="TAR-31"])
mk.test(micros$len, alternative = "two.sided", continuity = TRUE) 
mk.test(micros$len[micros$Locality=="TAR-31"], alternative = "two.sided", continuity = TRUE) 
mk.test(micros$len[micros$Locality=="La_Venta"], alternative = "two.sided", continuity = TRUE) 
mk.test(micros$wid, alternative = "two.sided", continuity = TRUE) 
mk.test(micros$wid[micros$Locality=="TAR-31"], alternative = "two.sided", continuity = TRUE) 
mk.test(micros$wid[micros$Locality=="La_Venta"], alternative = "two.sided", continuity = TRUE) 
mk.test(micros$wid1, alternative = "two.sided", continuity = TRUE) 
mk.test(micros$wid1[micros$Locality=="TAR-31"], alternative = "two.sided", continuity = TRUE) 
mk.test(micros$wid1[micros$Locality=="La_Venta"], alternative = "two.sided", continuity = TRUE) 


spearman.ci(micros$len,micros$wid)
cor.test(micros$len,micros$wid,method="spearman")
cor.test(micros$len,micros$wid1,method="pearson",use="pairwise.complete.obs")

t.test(micros$len~micros$Locality,var.equal=FALSE)
t.test(micros$wid1~micros$Locality,var.equal=TRUE)
perm.t.test(micros$wid~micros$Locality)

ratio<-micros$len/micros$wid
micros1<-cbind(micros,ratio)
shapiro.test(micros1$ratio)
shapiro.test(micros1$ratio[micros1$Locality=="TAR-31"])
shapiro.test(micros1$ratio[micros1$Locality=="La_Venta"])
var.test(micros1$ratio~micros1$Locality)
bartels.test(micros1$ratio)
bartels.test(micros1$ratio[micros1$Locality=="TAR-31"])
mk.test(micros1$ratio, alternative = "two.sided", continuity = TRUE) 
mk.test(micros1$ratio[micros1$Locality=="TAR-31"], alternative = "two.sided", continuity = TRUE) 
mk.test(micros1$ratio[micros1$Locality=="La_Venta"], alternative = "two.sided", continuity = TRUE) 

t.test(micros1$ratio~micros1$Locality,var.equal=TRUE)

al<-vector(mode="numeric")
projlen<-micros$len
for(i in 2:18)
{ml<-kmeans(projlen,i)
al<-append(al,ml$betweenss)}
plot(2:18,al)
aw<-vector(mode="numeric")
projwid<-micros$wid
for(i in 2:18)
{mw<-kmeans(projwid,i)
aw<-append(aw,mw$betweenss)}
plot(2:18,aw)

projlen<-micros$len
projwid<-micros$wid
Dl<-dist(projlen, method="euclidian")
Dw<-dist(projwid, method="euclidian")
mod1lenk<-kmeans(projlen,2)
mod1widk<-kmeans(projwid,2)
microsMod<-cbind(micros,mod1lenk$cluster)
mod1lenp<-pam(Dl, 2)
mod1widp<-pam(Dw, 2)
microsMod<-cbind(microsMod,mod1lenp$clustering)
microsMod<-cbind(microsMod,mod1widk$cluster)
microsMod<-cbind(microsMod,mod1widp$clustering)
mod2lenk<-kmeans(projlen,3)
mod2widk<-kmeans(projwid,3)
microsMod<-cbind(microsMod,mod2lenk$cluster)
mod2lenp<-pam(Dl, 3)
mod2widp<-pam(Dw, 3)
microsMod<-cbind(microsMod,mod2lenp$clustering)
microsMod<-cbind(microsMod,mod2widk$cluster)
microsMod<-cbind(microsMod,mod2widp$clustering)
mod3lenk<-kmeans(projlen,4)
mod3widk<-kmeans(projwid,4)
microsMod<-cbind(microsMod,mod3lenk$cluster)
mod3lenp<-pam(Dl, 4)
mod3widp<-pam(Dw, 4)
microsMod<-cbind(microsMod,mod3lenp$clustering)
microsMod<-cbind(microsMod,mod3widk$cluster)
microsMod<-cbind(microsMod,mod3widp$clustering)
mod4lenk<-kmeans(projlen,5)
mod4widk<-kmeans(projwid,5)
microsMod<-cbind(microsMod,mod4lenk$cluster)
mod4lenp<-pam(Dl, 5)
mod4widp<-pam(Dw, 5)
microsMod<-cbind(microsMod,mod4lenp$clustering)
microsMod<-cbind(microsMod,mod4widk$cluster)
microsMod<-cbind(microsMod,mod4widp$clustering)
mod5lenk<-kmeans(projlen,6)
mod5widk<-kmeans(projwid,6)
microsMod<-cbind(microsMod,mod5lenk$cluster)
mod5lenp<-pam(Dl, 6)
mod5widp<-pam(Dw, 6)
microsMod<-cbind(microsMod,mod5lenp$clustering)
microsMod<-cbind(microsMod,mod5widk$cluster)
microsMod<-cbind(microsMod,mod5widp$clustering)
mod6lenk<-kmeans(projlen,7)
mod6widk<-kmeans(projwid,7)
microsMod<-cbind(microsMod,mod6lenk$cluster)
mod6lenp<-pam(Dl, 7)
mod6widp<-pam(Dw, 7)
microsMod<-cbind(microsMod,mod6lenp$clustering)
microsMod<-cbind(microsMod,mod6widk$cluster)
microsMod<-cbind(microsMod,mod6widp$clustering)
mod7lenk<-kmeans(projlen,8)
mod7widk<-kmeans(projwid,8)
microsMod<-cbind(microsMod,mod7lenk$cluster)
mod7lenp<-pam(Dl, 8)
mod7widp<-pam(Dw, 8)
microsMod<-cbind(microsMod,mod7lenp$clustering)
microsMod<-cbind(microsMod,mod7widk$cluster)
microsMod<-cbind(microsMod,mod7widp$clustering)
mod8lenk<-kmeans(projlen,9)
mod8widk<-kmeans(projwid,9)
microsMod<-cbind(microsMod,mod8lenk$cluster)
mod8lenp<-pam(Dl, 9)
mod8widp<-pam(Dw, 9)
microsMod<-cbind(microsMod,mod8lenp$clustering)
microsMod<-cbind(microsMod,mod8widk$cluster)
microsMod<-cbind(microsMod,mod8widp$clustering)
mod9lenk<-kmeans(projlen,10)
mod9widk<-kmeans(projwid,10)
microsMod<-cbind(microsMod,mod9lenk$cluster)
mod9lenp<-pam(Dl, 10)
mod9widp<-pam(Dw, 10)
microsMod<-cbind(microsMod,mod9lenp$clustering)
microsMod<-cbind(microsMod,mod9widk$cluster)
microsMod<-cbind(microsMod,mod9widp$clustering)
mod10lenk<-kmeans(projlen,11)
mod10widk<-kmeans(projwid,11)
microsMod<-cbind(microsMod,mod10lenk$cluster)
mod10lenp<-pam(Dl, 11)
mod10widp<-pam(Dw, 11)
microsMod<-cbind(microsMod,mod10lenp$clustering)
microsMod<-cbind(microsMod,mod10widk$cluster)
microsMod<-cbind(microsMod,mod10widp$clustering)
mod11lenk<-kmeans(projlen,12)
mod11widk<-kmeans(projwid,12)
microsMod<-cbind(microsMod,mod11lenk$cluster)
mod11lenp<-pam(Dl, 12)
mod11widp<-pam(Dw, 12)
microsMod<-cbind(microsMod,mod11lenp$clustering)
microsMod<-cbind(microsMod,mod11widk$cluster)
microsMod<-cbind(microsMod,mod11widp$clustering)
mod12lenk<-kmeans(projlen,13)
mod12widk<-kmeans(projwid,13)
microsMod<-cbind(microsMod,mod12lenk$cluster)
mod12lenp<-pam(Dl, 13)
mod12widp<-pam(Dw, 13)
microsMod<-cbind(microsMod,mod12lenp$clustering)
microsMod<-cbind(microsMod,mod12widk$cluster)
microsMod<-cbind(microsMod,mod12widp$clustering)
mod13lenk<-kmeans(projlen,14)
mod13widk<-kmeans(projwid,14)
microsMod<-cbind(microsMod,mod13lenk$cluster)
mod13lenp<-pam(Dl, 14)
mod13widp<-pam(Dw, 14)
microsMod<-cbind(microsMod,mod13lenp$clustering)
microsMod<-cbind(microsMod,mod13widk$cluster)
microsMod<-cbind(microsMod,mod13widp$clustering)
mod14lenk<-kmeans(projlen,15)
mod14widk<-kmeans(projwid,15)
microsMod<-cbind(microsMod,mod14lenk$cluster)
mod14lenp<-pam(Dl, 15)
mod14widp<-pam(Dw, 15)
microsMod<-cbind(microsMod,mod14lenp$clustering)
microsMod<-cbind(microsMod,mod14widk$cluster)
microsMod<-cbind(microsMod,mod14widp$clustering)
write.csv(microsMod, file="microsModPartition.txt")
