# Supplementary material for: Late middle Miocene caviomorph rodents from Tarapoto, Peruvian Amazonia
Source: PLoS One. 2021 Nov 3;16(11):e0258455. doi: 10.1371/journal.pone.0258455 (PMC8565788; doi:10.1371/journal.pone.0258455)
Supplement: S2 File — (ZIP) [file pone.0258455.s002.zip › S2_File/dP4s/Stat_dP4s.txt]

Numero	Loci	len	wid	Hlin	Hlab	Locality	Species
6	l dP4	1,646	1,183	1,08	0,657	TAR-31	Microscleromys
7	l dP4	1,695	1,198	NA	NA	TAR-31	Microscleromys
8	l dP4	1,746	1,289	1,05	0,69	TAR-31	Microscleromys
9	l dP4	1,794	1,182	0,958	0,651	TAR-31	Microscleromys
10	l dP4	1,717	1,209	NA	NA	TAR-31	Microscleromys
11	l dP4	1,82	1,276	NA	NA	TAR-31	Microscleromys
12	l dP4	1,844	2,007	NA	NA	TAR-31	Microscleromys
13	l dP4	1,467	1,104	1,034	0,713	TAR-31	Microscleromys
14	l dP4	1,614	1,018	0,776	0,516	TAR-31	Microscleromys
22	r dP4	1,719	1,343	NA	NA	TAR-31	Microscleromys
23	r dP4	1,469	1,327	NA	NA	TAR-31	Microscleromys
24	r dP4	1,843	1,272	NA	NA	TAR-31	Microscleromys
25	r dP4	1,603	1,197	NA	NA	TAR-31	Microscleromys
26	r dP4	1,544	1,378	NA	NA	TAR-31	Microscleromys
27	r dP4	1,786	1,312	NA	NA	TAR-31	Microscleromys
28	r dP4	1,568	1,052	NA	NA	TAR-31	Microscleromys	
29	r dP4	1,659	1,131	NA	NA	TAR-31	Microscleromys	
IGM-DU 88-802	l dP4	2,15	1,46	NA	NA	La_Venta	Microscleromys cribriphilus	
IGM-DU 88-815	l dP4	2	1,38	NA	NA	La_Venta	Microscleromys cribriphilus	
ING-KU unnumbered	l dP4	2,05	1,64	NA	NA	La_Venta	Microscleromys cribriphilus	
IGM 250320	r dP4	1,5	1,1	NA	NA	La_Venta	Microscleromys cribriphilus	
