# Supplementary material for: Late middle Miocene caviomorph rodents from Tarapoto, Peruvian Amazonia
Source: PLoS One. 2021 Nov 3;16(11):e0258455. doi: 10.1371/journal.pone.0258455 (PMC8565788; doi:10.1371/journal.pone.0258455)
Supplement: S2 File — (ZIP) [file pone.0258455.s002.zip › S2_File/m1-2/Models/microsMod_m1-2.txt]

Numero	len	wid	Locality	Species	Mod1	Mod2	Mod3	Mod4	Mod5	Mod6	Mod7	Mod8	Mod9	Mod10	Mod11	Mod12	Mod13	Mod14	Mod15	Mod16	Mod17	Mod18	Mod19	Mod20	Mod21	Mod22	Mod23	Mod24	Mod25	Mod26	Mod27	Mod28	Mod29	Mod30	Mod31	Mod32	Mod33	Mod34	Mod35	Mod36	Mod37	Mod38	Mod39	Mod40	Mod41	Mod42	Mod43	Mod44	Mod45	Mod46	Mod47	Mod48	Mod49	Mod50	Mod51
162	1,563	1,275	TAR-31	Microscleromys	MW	M	M	M	M	M	M1	M1	M1	M1	M1	M1	M1	M1	M1W2W3	M1W1W3	M1W1W2	M1W1W3	M1W1	M1W2W3	M1W2	M1W1W2	M1W3	LP1	WP1	LP1	WP1	LP1	WP1	LP1	WP1	LP1	WP1	LP1	WP1	LP1	WP1	LP1	WP1	LP1	WP1	LP1	WP1	LP1	WP1	LP1	WP1	LP1	WP1	LP1	WP1
165	1,479	1,308	TAR-31	Microscleromys	MW	M	M	M	M	M	M1	M1	M1	M1	M1	M1	M1	M1	M1W2W3	M1W1W3	M1W1W2	M1W1W3	M1W1	M1W2W3	M1W2	M1W1W2	M1W3	LP1	WP1	LP2	WP1	LP2	WP1	LP2	WP1	LP2	WP1	LP2	WP1	LP2	WP1	LP2	WP1	LP2	WP2	LP2	WP2	LP2	WP2	LP2	WP2	LP2	WP2	LP2	WP2
166	1,548	1,266	TAR-31	Microscleromys	MW	M	M	M	M	M	M1	M1	M1	M1	M1	M1	M1	M1	M1W2W3	M1W1W3	M1W1W2	M1W1W3	M1W1	M1W2W3	M1W2	M1W1W2	M1W3	LP1	WP1	LP2	WP1	LP1	WP1	LP1	WP1	LP1	WP1	LP1	WP1	LP1	WP1	LP1	WP1	LP1	WP1	LP1	WP1	LP1	WP1	LP1	WP1	LP1	WP1	LP3	WP1
169	1,655	1,355	TAR-31	Microscleromys	MW	M	M	M	M	M	M2	M2	M2	M2	M2	M2W2W3	M2W1W3	M2W1W2	M2	M2	M2	M2W2	M2W2W3	M2W1	M2W1W3	M2W3	M2W1W2	LP1	WP1	LP1	WP2	LP3	WP2	LP3	WP2	LP3	WP1	LP3	WP2	LP3	WP2	LP3	WP2	LP3	WP3	LP3	WP3	LP3	WP3	LP3	WP3	LP3	WP3	LP4	WP3
170	1,678	1,364	TAR-31	Microscleromys	MW	M	M	M	M	M	M2	M2	M2	M2	M2	M2W2W3	M2W1W3	M2W1W2	M2	M2	M2	M2W2	M2W2W3	M2W1	M2W1W3	M2W3	M2W1W2	LP1	WP1	LP1	WP2	LP3	WP2	LP3	WP2	LP3	WP2	LP3	WP2	LP4	WP2	LP4	WP2	LP4	WP3	LP4	WP3	LP4	WP3	LP4	WP3	LP4	WP3	LP5	WP3
171	1,785	1,416	TAR-31	Microscleromys	MW	M	M	M	M	M	M2	M2	M2	M2	M2	M2W2W3	M2W1W3	M2W1W2	M2	M2	M2	M2W2	M2W2W3	M2W1	M2W1W3	M2W3	M2W1W2	LP2	WP1	LP3	WP2	LP4	WP2	LP4	WP2	LP4	WP2	LP4	WP3	LP5	WP3	LP5	WP3	LP5	WP4	LP5	WP4	LP5	WP4	LP5	WP4	LP5	WP4	LP6	WP4
175	1,858	1,531	TAR-31	Microscleromys	MW	M	M	M	M	M	M2	M2	M2	M2	M2	M2W2W3	M2W1W3	M2W1W2	M2	M2	M2	M2W2	M2W2W3	M2W1	M2W1W3	M2W3	M2W1W2	LP2	WP2	LP3	WP3	LP4	WP3	LP4	WP3	LP4	WP3	LP5	WP4	LP6	WP4	LP6	WP4	LP6	WP5	LP6	WP5	LP6	WP5	LP6	WP5	LP6	WP5	LP7	WP5
176	1,811	1,598	TAR-31	Microscleromys	MW	M	M	M	M	M	M2	M2	M2	M2	M2	M2W2W3	M2W1W3	M2W1W2	M2	M2	M2	M2W2	M2W2W3	M2W1	M2W1W3	M2W3	M2W1W2	LP2	WP2	LP3	WP3	LP4	WP4	LP4	WP3	LP4	WP4	LP5	WP5	LP5	WP4	LP5	WP4	LP5	WP6	LP5	WP6	LP5	WP6	LP5	WP6	LP5	WP6	LP6	WP6
177	2,019	1,730	TAR-31	Microscleromys	MW	M	M	M	M	M	M2	M2	M2	M2	M2	M2W2W3	M2W1W3	M2W1W2	M2	M2	M2	M2W2	M2W2W3	M2W1	M2W1W3	M2W3	M2W1W2	LP2	WP2	LP3	WP3	LP4	WP4	LP5	WP4	LP5	WP5	LP6	WP6	LP7	WP5	LP7	WP5	LP7	WP7	LP7	WP7	LP7	WP7	LP7	WP7	LP7	WP7	LP8	WP7
178	1,843	1,830	TAR-31	Microscleromys	MW	M	M	M	M	M	M2	M2	M2	M2	M2	M2W2W3	M2W1W3	M2W1W2	M2	M2	M2	M2W2	M2W2W3	M2W1	M2W1W3	M2W3	M2W1W2	LP2	WP2	LP3	WP3	LP4	WP4	LP4	WP4	LP4	WP5	LP5	WP6	LP6	WP6	LP6	WP6	LP6	WP8	LP6	WP8	LP6	WP8	LP6	WP8	LP6	WP8	LP7	WP8
180	1,431	1,208	TAR-31	Microscleromys	MW	M	M	M	M	M	M1	M1	M1	M1	M1	M1	M1	M1	M1W2W3	M1W1W3	M1W1W2	M1W1W3	M1W1	M1W2W3	M1W2	M1W1W2	M1W3	LP1	WP1	LP2	WP1	LP2	WP1	LP2	WP1	LP6	WP6	LP2	WP7	LP2	WP7	LP2	WP7	LP8	WP9	LP8	WP9	LP8	WP9	LP8	WP9	LP8	WP9	LP9	WP9
182	1,416	1,271	TAR-31	Microscleromys	MW	M	M	M	M	M	M1	M1	M1	M1	M1	M1	M1	M1	M1W2W3	M1W1W3	M1W1W2	M1W1W3	M1W1	M1W2W3	M1W2	M1W1W2	M1W3	LP1	WP1	LP2	WP1	LP2	WP1	LP2	WP1	LP6	WP1	LP7	WP1	LP8	WP1	LP8	WP1	LP8	WP1	LP8	WP1	LP8	WP1	LP8	WP1	LP8	WP1	LP9	WP1
184	1,535	1,442	TAR-31	Microscleromys	MW	M	M	M	M	M	M1	M1	M1	M1	M1	M1	M1	M1	M1W2W3	M1W1W3	M1W1W2	M1W1W3	M1W1	M1W2W3	M1W2	M1W1W2	M1W3	LP1	WP1	LP2	WP2	LP1	WP2	LP1	WP5	LP2	WP2	LP1	WP3	LP1	WP3	LP1	WP3	LP2	WP4	LP2	WP4	LP9	WP10	LP9	WP10	LP9	WP10	LP3	WP10
185	1,496	1,232	TAR-31	Microscleromys	MW	M	M	M	M	M	M1	M1	M1	M1	M1	M1	M1	M1	M1W2W3	M1W1W3	M1W1W2	M1W1W3	M1W1	M1W2W3	M1W2	M1W1W2	M1W3	LP1	WP1	LP2	WP1	LP1	WP1	LP1	WP1	LP2	WP6	LP2	WP7	LP2	WP7	LP2	WP7	LP2	WP1	LP2	WP9	LP9	WP9	LP9	WP9	LP9	WP9	LP10	WP9
186	1,442	1,381	TAR-31	Microscleromys	MW	M	M	M	M	M	M1	M1	M1	M1	M1	M1	M1	M1	M1W2W3	M1W1W3	M1W1W2	M1W1W3	M1W1	M1W2W3	M1W2	M1W1W2	M1W3	LP1	WP1	LP2	WP2	LP2	WP2	LP2	WP2	LP2	WP2	LP2	WP2	LP2	WP2	LP2	WP2	LP8	WP3	LP8	WP3	LP8	WP3	LP8	WP11	LP8	WP11	LP9	WP11
187	1,535	1,325	TAR-31	Microscleromys	MW	M	M	M	M	M	M1	M1	M1	M1	M1	M1	M1	M1	M1W2W3	M1W1W3	M1W1W2	M1W1W3	M1W1	M1W2W3	M1W2	M1W1W2	M1W3	LP1	WP1	LP2	WP1	LP1	WP2	LP1	WP2	LP2	WP1	LP1	WP2	LP1	WP2	LP1	WP2	LP2	WP2	LP2	WP2	LP9	WP2	LP9	WP2	LP9	WP2	LP3	WP2
188	1,561	1,392	TAR-31	Microscleromys	MW	M	M	M	M	M	M1	M1	M1	M1	M1	M1	M1	M1	M1W2W3	M1W1W3	M1W1W2	M1W1W3	M1W1	M1W2W3	M1W2	M1W1W2	M1W3	LP1	WP1	LP1	WP2	LP1	WP2	LP1	WP2	LP1	WP2	LP1	WP3	LP1	WP3	LP1	WP3	LP1	WP4	LP1	WP4	LP1	WP4	LP1	WP11	LP1	WP11	LP1	WP11
189	1,637	1,308	TAR-31	Microscleromys	MW	M	M	M	M	M	M2	M2	M2	M2	M2	M2W2W3	M2W1W3	M2W1W2	M2	M2	M2	M2W2	M2W2W3	M2W1	M2W1W3	M2W3	M2W1W2	LP1	WP1	LP1	WP1	LP3	WP1	LP3	WP1	LP3	WP1	LP3	WP1	LP3	WP1	LP3	WP1	LP3	WP2	LP3	WP2	LP3	WP2	LP3	WP2	LP3	WP2	LP4	WP2
190	1,639	1,440	TAR-31	Microscleromys	MW	M	M	M	M	M	M2	M2	M2	M2	M2	M2W2W3	M2W1W3	M2W1W2	M2	M2	M2	M2W2	M2W2W3	M2W1	M2W1W3	M2W3	M2W1W2	LP1	WP1	LP1	WP2	LP3	WP2	LP3	WP5	LP3	WP2	LP3	WP3	LP3	WP3	LP3	WP3	LP3	WP4	LP3	WP4	LP3	WP10	LP3	WP10	LP3	WP10	LP4	WP10
191	1,717	1,414	TAR-31	Microscleromys	MW	M	M	M	M	M	M2	M2	M2	M2	M2	M2W2W3	M2W1W3	M2W1W2	M2	M2	M2	M2W2	M2W2W3	M2W1	M2W1W3	M2W3	M2W1W2	LP2	WP1	LP1	WP2	LP3	WP2	LP3	WP2	LP3	WP2	LP4	WP3	LP4	WP3	LP4	WP3	LP4	WP4	LP9	WP4	LP10	WP4	LP10	WP4	LP10	WP4	LP11	WP4
192	1,472	1,208	TAR-31	Microscleromys	MW	M	M	M	M	M	M1	M1	M1	M1	M1	M1	M1	M1	M1W2W3	M1W1W3	M1W1W2	M1W1W3	M1W1	M1W2W3	M1W2	M1W1W2	M1W3	LP1	WP1	LP2	WP1	LP2	WP1	LP2	WP1	LP2	WP6	LP2	WP7	LP2	WP7	LP2	WP7	LP2	WP9	LP2	WP9	LP2	WP9	LP2	WP9	LP2	WP9	LP2	WP9
193	1,349	1,156	TAR-31	Microscleromys	MW	M	M	M	M	M	M1	M1	M1	M1	M1	M1	M1	M1	M1W2W3	M1W1W3	M1W1W2	M1W1W3	M1W1	M1W2W3	M1W2	M1W1W2	M1W3	LP1	WP1	LP2	WP1	LP2	WP1	LP2	WP1	LP6	WP6	LP7	WP7	LP8	WP7	LP8	WP8	LP9	WP9	LP10	WP10	LP11	WP11	LP11	WP12	LP11	WP12	LP12	WP12
194	1,505	1,221	TAR-31	Microscleromys	MW	M	M	M	M	M	M1	M1	M1	M1	M1	M1	M1	M1	M1W2W3	M1W1W3	M1W1W2	M1W1W3	M1W1	M1W2W3	M1W2	M1W1W2	M1W3	LP1	WP1	LP2	WP1	LP1	WP1	LP1	WP1	LP2	WP6	LP2	WP7	LP2	WP7	LP2	WP7	LP2	WP1	LP2	WP9	LP9	WP9	LP9	WP9	LP9	WP9	LP10	WP9
195	1,509	1,162	TAR-31	Microscleromys	MW	M	M	M	M	M	M1	M1	M1	M1	M1	M1	M1	M1	M1W2W3	M1W1W3	M1W1W2	M1W1W3	M1W1	M1W2W3	M1W2	M1W1W2	M1W3	LP1	WP1	LP2	WP1	LP1	WP1	LP1	WP1	LP2	WP6	LP2	WP7	LP2	WP7	LP2	WP8	LP2	WP9	LP2	WP10	LP9	WP11	LP9	WP12	LP9	WP12	LP10	WP12
196	1,485	1,238	TAR-31	Microscleromys	MW	M	M	M	M	M	M1	M1	M1	M1	M1	M1	M1	M1	M1W2W3	M1W1W3	M1W1W2	M1W1W3	M1W1	M1W2W3	M1W2	M1W1W2	M1W3	LP1	WP1	LP2	WP1	LP2	WP1	LP2	WP1	LP2	WP6	LP2	WP7	LP2	WP7	LP2	WP7	LP2	WP1	LP2	WP9	LP2	WP9	LP2	WP9	LP2	WP9	LP2	WP9
197	1,581	1,275	TAR-31	Microscleromys	MW	M	M	M	M	M	M1	M1	M1	M1	M1	M1	M1	M1	M1W2W3	M1W1W3	M1W1W2	M1W1W3	M1W1	M1W2W3	M1W2	M1W1W2	M1W3	LP1	WP1	LP1	WP1	LP1	WP1	LP1	WP1	LP1	WP1	LP1	WP1	LP1	WP1	LP1	WP1	LP1	WP1	LP1	WP1	LP1	WP1	LP1	WP1	LP1	WP1	LP1	WP1
198	1,585	1,353	TAR-31	Microscleromys	MW	M	M	M	M	M	M1	M1	M1	M1	M1	M1	M1	M1	M1W2W3	M1W1W3	M1W1W2	M1W1W3	M1W1	M1W2W3	M1W2	M1W1W2	M1W3	LP1	WP1	LP1	WP2	LP1	WP2	LP1	WP2	LP1	WP1	LP1	WP2	LP1	WP2	LP1	WP2	LP1	WP3	LP1	WP3	LP1	WP3	LP12	WP3	LP12	WP3	LP13	WP3
199	1,598	1,388	TAR-31	Microscleromys	MW	M	M	M	M	M	M2	M2	M2	M2	M2	M2W2W3	M2W1W3	M2W1W2	M2	M2	M2	M2W2	M2W2W3	M2W1	M2W1W3	M2W3	M2W1W2	LP1	WP1	LP1	WP2	LP1	WP2	LP1	WP2	LP1	WP2	LP1	WP3	LP1	WP3	LP1	WP3	LP1	WP3	LP1	WP3	LP1	WP4	LP12	WP11	LP12	WP11	LP13	WP11
200	1,622	1,459	TAR-31	Microscleromys	MW	M	M	M	M	M	M2	M2	M2	M2	M2	M2W2W3	M2W1W3	M2W1W2	M2	M2	M2	M2W2	M2W2W3	M2W1	M2W1W3	M2W3	M2W1W2	LP1	WP1	LP1	WP2	LP1	WP3	LP1	WP5	LP1	WP3	LP3	WP4	LP3	WP8	LP3	WP9	LP3	WP10	LP3	WP11	LP3	WP10	LP3	WP10	LP3	WP10	LP4	WP10
201	1,707	1,414	TAR-31	Microscleromys	MW	M	M	M	M	M	M2	M2	M2	M2	M2	M2W2W3	M2W1W3	M2W1W2	M2	M2	M2	M2W2	M2W2W3	M2W1	M2W1W3	M2W3	M2W1W2	LP2	WP1	LP1	WP2	LP3	WP2	LP3	WP2	LP3	WP2	LP4	WP3	LP4	WP3	LP4	WP3	LP4	WP4	LP4	WP4	LP4	WP4	LP4	WP4	LP4	WP4	LP5	WP4
202	1,685	1,407	TAR-31	Microscleromys	MW	M	M	M	M	M	M2	M2	M2	M2	M2	M2W2W3	M2W1W3	M2W1W2	M2	M2	M2	M2W2	M2W2W3	M2W1	M2W1W3	M2W3	M2W1W2	LP1	WP1	LP1	WP2	LP3	WP2	LP3	WP2	LP3	WP2	LP4	WP3	LP4	WP3	LP4	WP3	LP4	WP4	LP4	WP4	LP4	WP4	LP4	WP4	LP4	WP4	LP5	WP4
203	1,700	1,488	TAR-31	Microscleromys	MW	M	M	M	M	M	M2	M2	M2	M2	M2	M2W2W3	M2W1W3	M2W1W2	M2	M2	M2	M2W2	M2W2W3	M2W1	M2W1W3	M2W3	M2W1W2	LP1	WP2	LP1	WP2	LP3	WP3	LP3	WP5	LP3	WP3	LP4	WP4	LP4	WP8	LP4	WP9	LP4	WP10	LP4	WP11	LP4	WP12	LP4	WP13	LP4	WP13	LP5	WP13
204	1,722	1,498	TAR-31	Microscleromys	MW	M	M	M	M	M	M2	M2	M2	M2	M2	M2W2W3	M2W1W3	M2W1W2	M2	M2	M2	M2W2	M2W2W3	M2W1	M2W1W3	M2W3	M2W1W2	LP2	WP2	LP1	WP2	LP3	WP3	LP3	WP5	LP3	WP3	LP4	WP4	LP4	WP8	LP4	WP9	LP4	WP10	LP9	WP11	LP10	WP12	LP10	WP13	LP10	WP13	LP11	WP13
205	1,767	1,490	TAR-31	Microscleromys	MW	M	M	M	M	M	M2	M2	M2	M2	M2	M2W2W3	M2W1W3	M2W1W2	M2	M2	M2	M2W2	M2W2W3	M2W1	M2W1W3	M2W3	M2W1W2	LP2	WP2	LP3	WP2	LP3	WP3	LP3	WP5	LP3	WP3	LP4	WP4	LP5	WP8	LP5	WP9	LP5	WP10	LP5	WP11	LP5	WP12	LP5	WP13	LP5	WP13	LP6	WP13
206	1,594	1,409	TAR-31	Microscleromys	MW	M	M	M	M	M	M1	M1	M1	M1	M1	M1	M1	M1	M1W2W3	M1W1W3	M1W1W2	M1W1W3	M1W1	M1W2W3	M1W2	M1W1W2	M1W3	LP1	WP1	LP1	WP2	LP1	WP2	LP1	WP2	LP1	WP2	LP1	WP3	LP1	WP3	LP1	WP3	LP1	WP4	LP1	WP4	LP1	WP4	LP12	WP4	LP12	WP4	LP13	WP4
142	1,884	1,655	TAR-31	Microscleromys	MW	M	M	M	M	M	M2	M2	M2	M2	M2	M2W2W3	M2W1W3	M2W1W2	M2	M2	M2	M2W2	M2W2W3	M2W1	M2W1W3	M2W3	M2W1W2	LP2	WP2	LP3	WP3	LP4	WP4	LP4	WP4	LP4	WP5	LP5	WP6	LP6	WP5	LP6	WP5	LP6	WP6	LP6	WP6	LP6	WP6	LP6	WP6	LP6	WP14	LP7	WP14
207	1,362	1,173	TAR-31	Microscleromys	MW	M	M	M	M	M	M1	M1	M1	M1	M1	M1	M1	M1	M1W2W3	M1W1W3	M1W1W2	M1W1W3	M1W1	M1W2W3	M1W2	M1W1W2	M1W3	LP1	WP1	LP2	WP1	LP2	WP1	LP2	WP1	LP6	WP6	LP7	WP7	LP8	WP7	LP8	WP8	LP9	WP9	LP10	WP10	LP11	WP11	LP11	WP12	LP11	WP12	LP12	WP12
209	1,370	1,149	TAR-31	Microscleromys	MW	M	M	M	M	M	M1	M1	M1	M1	M1	M1	M1	M1	M1W2W3	M1W1W3	M1W1W2	M1W1W3	M1W1	M1W2W3	M1W2	M1W1W2	M1W3	LP1	WP1	LP2	WP1	LP2	WP1	LP2	WP1	LP6	WP6	LP7	WP7	LP8	WP7	LP8	WP8	LP9	WP9	LP10	WP10	LP11	WP11	LP11	WP12	LP11	WP12	LP12	WP12
211	1,412	1,303	TAR-31	Microscleromys	MW	M	M	M	M	M	M1	M1	M1	M1	M1	M1	M1	M1	M1W2W3	M1W1W3	M1W1W2	M1W1W3	M1W1	M1W2W3	M1W2	M1W1W2	M1W3	LP1	WP1	LP2	WP1	LP2	WP1	LP2	WP1	LP6	WP1	LP7	WP1	LP8	WP1	LP8	WP1	LP8	WP2	LP8	WP2	LP8	WP2	LP8	WP2	LP8	WP2	LP9	WP2
212	1,507	1,347	TAR-31	Microscleromys	MW	M	M	M	M	M	M1	M1	M1	M1	M1	M1	M1	M1	M1W2W3	M1W1W3	M1W1W2	M1W1W3	M1W1	M1W2W3	M1W2	M1W1W2	M1W3	LP1	WP1	LP2	WP2	LP1	WP2	LP1	WP2	LP2	WP1	LP2	WP2	LP2	WP2	LP2	WP2	LP2	WP3	LP2	WP3	LP9	WP3	LP9	WP3	LP9	WP3	LP10	WP3
213	1,386	1,201	TAR-31	Microscleromys	MW	M	M	M	M	M	M1	M1	M1	M1	M1	M1	M1	M1	M1W2W3	M1W1W3	M1W1W2	M1W1W3	M1W1	M1W2W3	M1W2	M1W1W2	M1W3	LP1	WP1	LP2	WP1	LP2	WP1	LP2	WP1	LP6	WP6	LP7	WP7	LP8	WP7	LP8	WP7	LP9	WP9	LP10	WP9	LP11	WP9	LP11	WP9	LP11	WP9	LP12	WP9
214	1,650	1,399	TAR-31	Microscleromys	MW	M	M	M	M	M	M2	M2	M2	M2	M2	M2W2W3	M2W1W3	M2W1W2	M2	M2	M2	M2W2	M2W2W3	M2W1	M2W1W3	M2W3	M2W1W2	LP1	WP1	LP1	WP2	LP3	WP2	LP3	WP2	LP3	WP2	LP3	WP3	LP3	WP3	LP3	WP3	LP3	WP4	LP3	WP4	LP3	WP4	LP3	WP11	LP3	WP11	LP4	WP11
215	1,459	1,338	TAR-31	Microscleromys	MW	M	M	M	M	M	M1	M1	M1	M1	M1	M1	M1	M1	M1W2W3	M1W1W3	M1W1W2	M1W1W3	M1W1	M1W2W3	M1W2	M1W1W2	M1W3	LP1	WP1	LP2	WP1	LP2	WP2	LP2	WP2	LP2	WP1	LP2	WP2	LP2	WP2	LP2	WP2	LP8	WP3	LP8	WP3	LP2	WP3	LP2	WP3	LP2	WP3	LP2	WP3
216	1,605	1,366	TAR-31	Microscleromys	MW	M	M	M	M	M	M2	M2	M2	M2	M2	M2W2W3	M2W1W3	M2W1W2	M2	M2	M2	M2W2	M2W2W3	M2W1	M2W1W3	M2W3	M2W1W2	LP1	WP1	LP1	WP2	LP1	WP2	LP1	WP2	LP1	WP2	LP1	WP2	LP1	WP2	LP1	WP2	LP1	WP3	LP1	WP3	LP1	WP3	LP12	WP3	LP12	WP3	LP13	WP3
217	1,570	1,375	TAR-31	Microscleromys	MW	M	M	M	M	M	M1	M1	M1	M1	M1	M1	M1	M1	M1W2W3	M1W1W3	M1W1W2	M1W1W3	M1W1	M1W2W3	M1W2	M1W1W2	M1W3	LP1	WP1	LP1	WP2	LP1	WP2	LP1	WP2	LP1	WP2	LP1	WP2	LP1	WP2	LP1	WP2	LP1	WP3	LP1	WP3	LP1	WP3	LP1	WP11	LP1	WP11	LP1	WP11
218	1,642	1,475	TAR-31	Microscleromys	MW	M	M	M	M	M	M2	M2	M2	M2	M2	M2W2W3	M2W1W3	M2W1W2	M2	M2	M2	M2W2	M2W2W3	M2W1	M2W1W3	M2W3	M2W1W2	LP1	WP2	LP1	WP2	LP3	WP3	LP3	WP5	LP3	WP3	LP3	WP4	LP3	WP8	LP3	WP9	LP3	WP10	LP3	WP11	LP3	WP12	LP3	WP13	LP3	WP13	LP4	WP13
219	1,902	1,557	TAR-31	Microscleromys	MW	M	M	M	M	M	M2	M2	M2	M2	M2	M2W2W3	M2W1W3	M2W1W2	M2	M2	M2	M2W2	M2W2W3	M2W1	M2W1W3	M2W3	M2W1W2	LP2	WP2	LP3	WP3	LP4	WP3	LP4	WP3	LP4	WP4	LP5	WP5	LP6	WP4	LP9	WP4	LP10	WP5	LP11	WP5	LP12	WP5	LP13	WP5	LP13	WP5	LP14	WP15
220	1,685	1,488	TAR-31	Microscleromys	MW	M	M	M	M	M	M2	M2	M2	M2	M2	M2W2W3	M2W1W3	M2W1W2	M2	M2	M2	M2W2	M2W2W3	M2W1	M2W1W3	M2W3	M2W1W2	LP1	WP2	LP1	WP2	LP3	WP3	LP3	WP5	LP3	WP3	LP4	WP4	LP4	WP8	LP4	WP9	LP4	WP10	LP4	WP11	LP4	WP12	LP4	WP13	LP4	WP13	LP5	WP13
221	1,782	1,572	TAR-31	Microscleromys	MW	M	M	M	M	M	M2	M2	M2	M2	M2	M2W2W3	M2W1W3	M2W1W2	M2	M2	M2	M2W2	M2W2W3	M2W1	M2W1W3	M2W3	M2W1W2	LP2	WP2	LP3	WP3	LP4	WP3	LP4	WP3	LP4	WP4	LP4	WP5	LP5	WP4	LP5	WP4	LP5	WP5	LP5	WP5	LP5	WP5	LP5	WP5	LP5	WP5	LP6	WP15
222	1,511	1,531	TAR-31	Microscleromys	MW	M	M	M	M	M	M1	M1	M1	M1	M1	M1	M1	M1	M1W2W3	M1W1W3	M1W1W2	M1W1W3	M1W1	M1W2W3	M1W2	M1W1W2	M1W3	LP1	WP2	LP2	WP3	LP1	WP3	LP1	WP3	LP2	WP3	LP2	WP4	LP2	WP4	LP2	WP4	LP2	WP5	LP2	WP5	LP9	WP5	LP9	WP5	LP9	WP5	LP10	WP5
223	1,947	1,672	TAR-31	Microscleromys	MW	M	M	M	M	M	M2	M2	M2	M2	M2	M2W2W3	M2W1W3	M2W1W2	M2	M2	M2	M2W2	M2W2W3	M2W1	M2W1W3	M2W3	M2W1W2	LP2	WP2	LP3	WP3	LP4	WP4	LP5	WP4	LP5	WP5	LP6	WP6	LP7	WP5	LP9	WP5	LP10	WP7	LP11	WP7	LP12	WP7	LP13	WP7	LP13	WP14	LP14	WP14
224	1,735	1,546	TAR-31	Microscleromys	MW	M	M	M	M	M	M2	M2	M2	M2	M2	M2W2W3	M2W1W3	M2W1W2	M2	M2	M2	M2W2	M2W2W3	M2W1	M2W1W3	M2W3	M2W1W2	LP2	WP2	LP1	WP3	LP3	WP3	LP3	WP3	LP3	WP4	LP4	WP5	LP4	WP4	LP4	WP4	LP4	WP5	LP9	WP5	LP10	WP5	LP10	WP5	LP10	WP5	LP11	WP5
226	1,824	1,583	TAR-31	Microscleromys	MW	M	M	M	M	M	M2	M2	M2	M2	M2	M2W2W3	M2W1W3	M2W1W2	M2	M2	M2	M2W2	M2W2W3	M2W1	M2W1W3	M2W3	M2W1W2	LP2	WP2	LP3	WP3	LP4	WP3	LP4	WP3	LP4	WP4	LP5	WP5	LP6	WP4	LP6	WP4	LP6	WP5	LP6	WP5	LP6	WP5	LP6	WP5	LP6	WP5	LP7	WP15
227	1,869	1,501	TAR-31	Microscleromys	MW	M	M	M	M	M	M2	M2	M2	M2	M2	M2W2W3	M2W1W3	M2W1W2	M2	M2	M2	M2W2	M2W2W3	M2W1	M2W1W3	M2W3	M2W1W2	LP2	WP2	LP3	WP2	LP4	WP3	LP4	WP5	LP4	WP3	LP5	WP4	LP6	WP8	LP6	WP9	LP6	WP10	LP6	WP11	LP6	WP12	LP6	WP13	LP6	WP13	LP7	WP13
229	1,375	1,392	TAR-31	Microscleromys	MW	M	M	M	M	M	M1	M1	M1	M1	M1	M1	M1	M1	M1W2W3	M1W1W3	M1W1W2	M1W1W3	M1W1	M1W2W3	M1W2	M1W1W2	M1W3	LP1	WP1	LP2	WP2	LP2	WP2	LP2	WP2	LP6	WP2	LP7	WP3	LP8	WP3	LP8	WP3	LP9	WP4	LP10	WP4	LP11	WP4	LP11	WP11	LP11	WP11	LP12	WP11
233	1,579	1,264	TAR-31	Microscleromys	MW	M	M	M	M	M	M1	M1	M1	M1	M1	M1	M1	M1	M1W2W3	M1W1W3	M1W1W2	M1W1W3	M1W1	M1W2W3	M1W2	M1W1W2	M1W3	LP1	WP1	LP1	WP1	LP1	WP1	LP1	WP1	LP1	WP1	LP1	WP1	LP1	WP1	LP1	WP1	LP1	WP1	LP1	WP1	LP1	WP1	LP1	WP1	LP1	WP1	LP1	WP1
234	1,572	1,303	TAR-31	Microscleromys	MW	M	M	M	M	M	M1	M1	M1	M1	M1	M1	M1	M1	M1W2W3	M1W1W3	M1W1W2	M1W1W3	M1W1	M1W2W3	M1W2	M1W1W2	M1W3	LP1	WP1	LP1	WP1	LP1	WP1	LP1	WP1	LP1	WP1	LP1	WP1	LP1	WP1	LP1	WP1	LP1	WP2	LP1	WP2	LP1	WP2	LP1	WP2	LP1	WP2	LP1	WP2
236	1,750	1,431	TAR-31	Microscleromys	MW	M	M	M	M	M	M2	M2	M2	M2	M2	M2W2W3	M2W1W3	M2W1W2	M2	M2	M2	M2W2	M2W2W3	M2W1	M2W1W3	M2W3	M2W1W2	LP2	WP1	LP3	WP2	LP3	WP2	LP3	WP2	LP3	WP2	LP4	WP3	LP5	WP3	LP5	WP3	LP5	WP4	LP9	WP4	LP10	WP10	LP10	WP10	LP10	WP10	LP11	WP10
237	1,592	1,446	TAR-31	Microscleromys	MW	M	M	M	M	M	M1	M1	M1	M1	M1	M1	M1	M1	M1W2W3	M1W1W3	M1W1W2	M1W1W3	M1W1	M1W2W3	M1W2	M1W1W2	M1W3	LP1	WP1	LP1	WP2	LP1	WP2	LP1	WP5	LP1	WP2	LP1	WP3	LP1	WP3	LP1	WP3	LP1	WP4	LP1	WP4	LP1	WP10	LP12	WP10	LP12	WP10	LP13	WP10
IGM-DU 88-807	1,850	1,630	La_Venta	Microscleromys paradoxalis	MW	W	W1W3	W1	W1W2	W1	W	W1W3	W1	W1W2	W1	W1	M2W1W3	M2W1W2	W1	M1W1W3	M1W1W2	M1W1W3	M1W1	M2W1	M2W1W3	M1W1W2	M2W1W2	LP2	WP2	LP3	WP3	LP4	WP4	LP4	WP3	LP4	WP4	LP5	WP5	LP6	WP5	LP6	WP5	LP6	WP6	LP6	WP6	LP6	WP6	LP6	WP6	LP6	WP6	LP7	WP6
IGM-DU 88-814	2,050	1,710	La_Venta	Microscleromys paradoxalis	MW	W	W1W3	W1	W1W2	W1	W	W1W3	W1	W1W2	W1	W1	M2W1W3	M2W1W2	W1	M1W1W3	M1W1W2	M1W1W3	M1W1	M2W1	M2W1W3	M1W1W2	M2W1W2	LP2	WP2	LP3	WP3	LP4	WP4	LP5	WP4	LP5	WP5	LP6	WP6	LP7	WP5	LP7	WP5	LP7	WP7	LP7	WP7	LP7	WP7	LP7	WP7	LP7	WP7	LP8	WP7
IGM-DU 88-819	1,950	1,800	La_Venta	Microscleromys paradoxalis	MW	W	W1W3	W1	W1W2	W1	W	W1W3	W1	W1W2	W1	W1	M2W1W3	M2W1W2	W1	M1W1W3	M1W1W2	M1W1W3	M1W1	M2W1	M2W1W3	M1W1W2	M2W1W2	LP2	WP2	LP3	WP3	LP4	WP4	LP5	WP4	LP5	WP5	LP6	WP6	LP7	WP6	LP9	WP6	LP10	WP8	LP11	WP8	LP12	WP8	LP13	WP8	LP13	WP8	LP14	WP8
IGM-DU 89-675	1,730	1,680	La_Venta	Microscleromys paradoxalis	MW	W	W1W3	W1	W1W2	W1	W	W1W3	W1	W1W2	W1	W1	M2W1W3	M2W1W2	W1	M1W1W3	M1W1W2	M1W1W3	M1W1	M2W1	M2W1W3	M1W1W2	M2W1W2	LP2	WP2	LP1	WP3	LP3	WP4	LP3	WP4	LP3	WP5	LP4	WP6	LP4	WP5	LP4	WP5	LP4	WP7	LP9	WP7	LP10	WP7	LP10	WP7	LP10	WP14	LP11	WP14
IGM-DU 88-788	2,100	1,490	La_Venta	Microscleromys cribriphilus	MW	W	W2	W2W3	W1W2	W2	W	W2	W2W3	W1W2	W2	M2W2W3	W2	M2W1W2	M1W2W3	W2	M1W1W2	M2W2	M2W2W3	M1W2W3	M1W2	M1W1W2	M2W1W2	LP2	WP2	LP3	WP2	LP4	WP3	LP5	WP5	LP5	WP3	LP6	WP4	LP7	WP8	LP7	WP9	LP7	WP10	LP7	WP11	LP7	WP12	LP7	WP13	LP14	WP13	LP15	WP13
IGM-DU 88-803	1,790	1,440	La_Venta	Microscleromys cribriphilus	MW	W	W2	W2W3	W1W2	W2	W	W2	W2W3	W1W2	W2	M2W2W3	W2	M2W1W2	M1W2W3	W2	M1W1W2	M2W2	M2W2W3	M1W2W3	M1W2	M1W1W2	M2W1W2	LP2	WP1	LP3	WP2	LP4	WP2	LP4	WP5	LP4	WP2	LP5	WP3	LP5	WP3	LP5	WP3	LP5	WP4	LP5	WP4	LP5	WP10	LP5	WP10	LP5	WP10	LP6	WP10
IGM-DU 89-676	1,69	1,62	La_Venta	Microscleromys cribriphilus	MW	W	W2	W2W3	W1W2	W2	W	W2	W2W3	W1W2	W2	M2W2W3	W2	M2W1W2	M1W2W3	W2	M1W1W2	M2W2	M2W2W3	M1W2W3	M1W2	M1W1W2	M2W1W2	LP1	WP2	LP1	WP3	LP3	WP4	LP3	WP3	LP3	WP4	LP4	WP5	LP4	WP4	LP4	WP4	LP4	WP6	LP4	WP6	LP4	WP6	LP4	WP6	LP4	WP6	LP5	WP6
ING-KU 8604	1,920	1,700	La_Venta	Microscleromys sp.	MW	W	W1W3	W2W3	W1W2	W3	W	W1W3	W2W3	W1W2	W3	M2W2W3	M2W1W3	W3	M1W2W3	M1W1W3	W3	M1W1W3	M2W2W3	M1W2W3	M2W1W3	M2W3	M1W3	LP2	WP2	LP3	WP3	LP4	WP4	LP4	WP4	LP4	WP5	LP5	WP6	LP6	WP5	LP9	WP5	LP10	WP7	LP11	WP7	LP12	WP7	LP13	WP7	LP13	WP7	LP14	WP7
ING-KU 8604	1,850	1,570	La_Venta	Microscleromys sp.	MW	W	W1W3	W2W3	W3	W3	W	W1W3	W2W3	W3	W3	M2W2W3	M2W1W3	W3	M1W2W3	M1W1W3	W3	M1W1W3	M2W2W3	M1W2W3	M2W1W3	M2W3	M1W3	LP2	WP2	LP3	WP3	LP4	WP3	LP4	WP3	LP4	WP4	LP5	WP5	LP6	WP4	LP6	WP4	LP6	WP5	LP6	WP5	LP6	WP5	LP6	WP5	LP6	WP5	LP7	WP15
