# Supplementary material for: Late middle Miocene caviomorph rodents from Tarapoto, Peruvian Amazonia
Source: PLoS One. 2021 Nov 3;16(11):e0258455. doi: 10.1371/journal.pone.0258455 (PMC8565788; doi:10.1371/journal.pone.0258455)
Supplement: S2 File — (ZIP) [file pone.0258455.s002.zip › S2_File/m1-2/Script_m1-2.txt]

###################### Microscleromys from TAR-31 vs. La_Venta ######################


# Necessary packages
install.packages("RVAideMemoire")
install.packages("trend")
install.packages("dunn.test")
install.packages("cluster")
library("trend")
library("RVAideMemoire")
library("dunn.test")
library("cluster")

# Change repertoire
setwd("E:/Recherche/Publis/Boivin&al,202X_TAR-31&La Venta/Stat/Tout/m1-2")
# Open data 
micros<-read.table("Stat_m1-2.txt", header=T, dec=",", sep= "\t")

# Definition of groups
TAR31<-micros[micros[,7]=="TAR-31",]
LV<-micros[micros[,7]=="La_Venta",]
Mp<-micros[micros[,8]=="Microscleromys paradoxalis" ,]
Mc<-micros[micros[,8]=="Microscleromys cribriphilus",]
Msp<-micros[micros[,8]=="Microscleromys sp.",]

############ Descriptive analyses
########### Position parameters
summary(micros[,3])
summary(TAR31[,3])
summary(LV[,3])
summary(Mp[,3])
summary(Mc[,3])
summary(Msp[,3])
summary(micros[,4])
summary(TAR31[,4])
summary(LV[,4])
summary(Mp[,4])
summary(Mc[,4])
summary(Msp[,4])
########### Dispersion parameters
var(micros[,3])
var(TAR31[,3])
var(LV[,3])
var(Mp[,3])
var(Mc[,3])
var(Msp[,3])
var(micros[,4])
var(TAR31[,4])
var(LV[,4])
var(Mp[,4])
var(Mc[,4])
var(Msp[,4])
sd(micros[,3])
sd(TAR31[,3])
sd(LV[,3])
sd(Mp[,3])
sd(Mc[,3])
sd(Msp[,3])
sd(micros[,4])
sd(TAR31[,4])
sd(LV[,4])
sd(Mp[,4])
sd(Mc[,4])
sd(Msp[,4])

########### Graphics
########## Univariate statistic
######### Dispersion diagram
stripchart(micros$len, vertical=T)
stripchart(micros$wid, vertical=T)
stripchart(micros$len~micros$Locality, vertical=T, names=c("TAR-31","La_Venta"))
stripchart(micros$wid~micros$Locality, vertical=T, names=c("TAR-31","La_Venta"))
stripchart(micros$len~micros$Species, vertical=T, names=c("Microscleromys","Microscleromys paradoxalis", "Microscleromys cribriphilus","Microscleromys sp."))
stripchart(micros$wid~micros$Species, vertical=T, names=c("Microscleromys","Microscleromys paradoxalis", "Microscleromys cribriphilus","Microscleromys sp."))
######### Histogram
hist(micros$len, probability=F)
hist(micros$wid, probability=F)
######### Boxplot
boxplot(micros$len)
boxplot(micros$wid)
boxplot(micros$len~micros$Locality, labels=c("TAR-31","La_Venta"))
boxplot(micros$wid~micros$Locality, labels=c("TAR-31","La_Venta"))
boxplot(micros$len~micros$Species, labels=c("Microscleromys","Microscleromys paradoxalis", "Microscleromys cribriphilus","Microscleromys sp."))
boxplot(micros$wid~micros$Species, labels=c("Microscleromys","Microscleromys paradoxalis", "Microscleromys cribriphilus","Microscleromys sp."))######### Diagramme en barres avec barres d�erreur
######### Barplot
######## Localities
####### Len
mlen31<-mean(micros$len[micros$Locality=="TAR-31"])
sdlen31<-sd(micros$len[micros$Locality=="TAR-31"])
mlenLV<-mean(micros$len[micros$Locality=="La_Venta"])
sdlenLV<-sd(micros$len[micros$Locality=="La_Venta"])
moylenGis<-c(mlen31, mlenLV)
sdlenGis<-c(sdlen31, sdlenLV)
abscisses<-barplot(moylenGis)
segments(abscisses,moylenGis-sdlenGis,abscisses,moylenGis+sdlenGis)
segments(abscisses-0.1,moylenGis-sdlenGis,abscisses+0.1,moylenGis-sdlenGis)
segments(abscisses-0.1,moylenGis+sdlenGis,abscisses+0.1,moylenGis+sdlenGis)
####### Wid
mwid31<-mean(micros$wid[micros$Locality=="TAR-31"])
sdwid31<-sd(micros$wid[micros$Locality=="TAR-31"])
mwidLV<-mean(micros$wid[micros$Locality=="La_Venta"])
sdwidLV<-sd(micros$wid[micros$Locality=="La_Venta"])
moywidGis<-c(mwid31, mwidLV)
sdwidGis<-c(sdwid31, sdwidLV)
abscisses<-barplot(moywidGis)
segments(abscisses,moywidGis-sdwidGis,abscisses,moywidGis+sdwidGis)
segments(abscisses-0.1,moywidGis-sdwidGis,abscisses+0.1,moywidGis-sdwidGis)
segments(abscisses-0.1,moywidGis+sdwidGis,abscisses+0.1,moywidGis+sdwidGis)
######## Species
####### Len
mlenMc<-mean(micros$len[micros$Species=="Microscleromys cribriphilus"])
mlenMp<-mean(micros$len[micros$Species=="Microscleromys paradoxalis"])
mlenMsp<-mean(micros$len[micros$Species=="Microscleromys sp."])
sdlenMp<-sd(micros$len[micros$Species=="Microscleromys paradoxalis"])
sdlenMc<-sd(micros$len[micros$Species=="Microscleromys cribriphilus"])
sdlenMsp<-sd(micros$len[micros$Species=="Microscleromys sp."])
moylenSp<-c(mlen31, mlenMc, mlenMp, mlenMsp)
sdlenSp<-c(sdlen31, sdlenMc, sdlenMp, sdlenMsp)
abscisses<-barplot(moylenSp)
segments(abscisses,moylenSp-sdlenSp,abscisses,moylenSp+sdlenSp)
segments(abscisses-0.1,moylenSp-sdlenSp,abscisses+0.1,moylenSp-sdlenSp)
segments(abscisses-0.1,moylenSp+sdlenSp,abscisses+0.1,moylenSp+sdlenSp)
####### Wid
mwidMp<-mean(micros$wid[micros$Species=="Microscleromys paradoxalis"])
mwidMc<-mean(micros$wid[micros$Species=="Microscleromys cribriphilus"])
mwidMsp<-mean(micros$wid[micros$Species=="Microscleromys sp."])
sdwidMp<-sd(micros$wid[micros$Species=="Microscleromys paradoxalis"])
sdwidMc<-sd(micros$wid[micros$Species=="Microscleromys cribriphilus"])
sdwidMsp<-sd(micros$wid[micros$Species=="Microscleromys sp."])
moywidSp<-c(mwid31, mwidMc, mwidMp, mwidMsp)
sdwidSp<-c(sdwid31, sdwidMc, sdwidMp, sdwidMsp)
abscisses<-barplot(moywidSp)
segments(abscisses,moywidSp-sdwidSp,abscisses,moywidSp+sdwidSp)
segments(abscisses-0.1,moywidSp-sdwidSp,abscisses+0.1,moywidSp-sdwidSp)
segments(abscisses-0.1,moywidSp+sdwidSp,abscisses+0.1,moywidSp+sdwidSp)
######### Bivariate statistics - plot
plot(micros[,3],micros[,4],pch=21,cex=2)
panel.smooth(micros[,3],micros[,4])
######## Localities
ColG<-c("blue","green")[as.factor(micros[,7])]
plot(micros[,3],micros[,4],pch=21,cex=2,bg=ColG)
######## Species
ColS<-c("red","yellow","orange","white")[as.factor(micros[,8])]
plot(micros[,3],micros[,4],pch=21,cex=2,bg=ColS)

############ Are parametric tests possible?
########## 1. Normality?
# Requirements of tests of ajustment of a distribution to a theorical value: random and simple sampling + tested variable must be quantitative and continuous
qqnorm(micros$len)
qqnorm(micros$len[micros$Locality=="TAR-31"])
qqnorm(micros$len[micros$Locality=="La_Venta"])
qqnorm(micros$wid)
qqnorm(micros$wid[micros$Locality=="TAR-31"])
qqnorm(micros$wid[micros$Locality=="La_Venta"])
shapiro.test(micros$len)
shapiro.test(micros$len[micros$Locality=="TAR-31"])
shapiro.test(micros$len[micros$Locality=="La_Venta"])
shapiro.test(micros$len[micros$Species=="Microscleromys paradoxalis"])
shapiro.test(micros$len[micros$Species=="Microscleromys cribriphilus"])
shapiro.test(micros$wid)
shapiro.test(micros$wid[micros$Locality=="TAR-31"])
shapiro.test(micros$wid[micros$Locality=="La_Venta"])
shapiro.test(micros$wid[micros$Species=="Microscleromys paradoxalis"])
shapiro.test(micros$wid[micros$Species=="Microscleromys cribriphilus"])
########## 2.Homoscedasticity
# Requirements : random and simple sampling + classes of factor must be exclusive
######### Two groups
######## Distribution N of two groups => Fisher test (parametric)
var.test(micros$len[micros$Locality=="TAR-31"], micros$len[micros$Locality=="La_Venta"])
var.test(micros$wid[micros$Locality=="TAR-31"], micros$wid[micros$Locality=="La_Venta"])
var.test(micros$len[micros$Species=="Microscleromys"], micros$len[micros$Species=="Microscleromys paradoxalis"])
var.test(micros$wid[micros$Species=="Microscleromys"], micros$wid[micros$Species=="Microscleromys paradoxalis"])
var.test(micros$len[micros$Species=="Microscleromys"], micros$len[micros$Species=="Microscleromys cribriphilus"])
var.test(micros$wid[micros$Species=="Microscleromys"], micros$wid[micros$Species=="Microscleromys cribriphilus"])
var.test(micros$len[micros$Species=="Microscleromys paradoxalis"], micros$len[micros$Species=="Microscleromys cribriphilus"])
var.test(micros$wid[micros$Species=="Microscleromys paradoxalis"], micros$wid[micros$Species=="Microscleromys cribriphilus"])
######## No normality of two groups or no testable => Fisher test by permutation (non parametric)
perm.var.test(micros$len[micros$Species=="Microscleromys"], micros$len[micros$Species=="Microscleromys sp."])
perm.var.test(micros$wid[micros$Species=="Microscleromys"], micros$wid[micros$Species=="Microscleromys sp."])
perm.var.test(micros$len[micros$Species=="Microscleromys sp."], micros$len[micros$Species=="Microscleromys cribriphilus"])
perm.var.test(micros$wid[micros$Species=="Microscleromys sp."], micros$wid[micros$Species=="Microscleromys cribriphilus"])
perm.var.test(micros$len[micros$Species=="Microscleromys sp."], micros$len[micros$Species=="Microscleromys paradoxalis"])
perm.var.test(micros$wid[micros$Species=="Microscleromys sp."], micros$wid[micros$Species=="Microscleromys paradoxalis"])
######### More than two groups
######## Unequal n-sample group => Bartlett test
####### No normality of groups and/or less of 4 individuals in each groups (or non testable) => Bartlett test by permutation
perm.bartlett.test(micros$len~micros$Species)
perm.bartlett.test(micros$wid~micros$Species)
######### Independent and identically distributed (i.i.d) samples
######## Bartels test
# Requirements: n>10
bartels.test(micros$len)
bartels.test(micros$len[micros$Locality=="TAR-31"])
bartels.test(micros$wid)
bartels.test(micros$wid[micros$Locality=="TAR-31"])
######## Mann-Kendall test
# Requirements: n>2
mk.test(micros$len,alternative = "two.sided", continuity = TRUE) 
mk.test(micros$len[micros$Locality=="TAR-31"], alternative = "two.sided", continuity = TRUE) 
mk.test(micros$len[micros$Locality=="La_Venta"], alternative = "two.sided", continuity = TRUE) 
mk.test(micros$len[micros$Species=="Microscleromys paradoxalis"], alternative = "two.sided", continuity = TRUE) 
mk.test(micros$len[micros$Species=="Microscleromys cribriphilus"], alternative = "two.sided", continuity = TRUE) 
mk.test(micros$wid,alternative = "two.sided", continuity = TRUE) 
mk.test(micros$wid[micros$Locality=="TAR-31"], alternative = "two.sided", continuity = TRUE) 
mk.test(micros$wid[micros$Locality=="La_Venta"], alternative = "two.sided", continuity = TRUE) 
mk.test(micros$wid[micros$Species=="Microscleromys paradoxalis"], alternative = "two.sided", continuity = TRUE) 
mk.test(micros$wid[micros$Species=="Microscleromys cribriphilus"], alternative = "two.sided", continuity = TRUE) 


######### Correlation betweem len and wid?
######## len and wid both normal => correlation coefficient of Pearson (linear relationship?)
cor.test(micros$len,micros$wid,method="pearson",use="pairwise.complete.obs")

###### With size effect
##### Two groups
#### Normality
### Homogenous variances => Student test 
t.test(micros$len~micros$Locality,var.equal=TRUE)
t.test(micros$wid~micros$Locality,var.equal=TRUE)
t.test(micros$len[micros$Species=="Microscleromys paradoxalis"],micros$len[micros$Locality=="TAR-31"],var.equal=TRUE)
t.test(micros$wid[micros$Species=="Microscleromys paradoxalis"],micros$wid[micros$Locality=="TAR-31"],var.equal=TRUE)
t.test(micros$len[micros$Species=="Microscleromys paradoxalis"],micros$len[micros$Species=="Microscleromys cribriphilus"],var.equal=TRUE)
t.test(micros$wid[micros$Species=="Microscleromys paradoxalis"],micros$wid[micros$Species=="Microscleromys cribriphilus"],var.equal=TRUE)
t.test(micros$len[micros$Species=="Microscleromys cribriphilus"],micros$len[micros$Locality=="TAR-31"],var.equal=TRUE)
t.test(micros$wid[micros$Species=="Microscleromys cribriphilus"],micros$wid[micros$Locality=="TAR-31"],var.equal=TRUE)
#### No normality
### Homogenous variances => Student test by permutation
perm.t.test(micros$len[micros$Species=="Microscleromys paradoxalis"],micros$len[micros$Species=="Microscleromys sp."])
perm.t.test(micros$len[micros$Species=="Microscleromys sp."],micros$len[micros$Species=="Microscleromys cribriphilus"])
perm.t.test(micros$len[micros$Species=="Microscleromys sp."],micros$len[micros$Locality=="TAR-31"])
perm.t.test(micros$wid[micros$Species=="Microscleromys paradoxalis"],micros$wid[micros$Species=="Microscleromys sp."])
perm.t.test(micros$wid[micros$Species=="Microscleromys sp."],micros$wid[micros$Species=="Microscleromys cribriphilus"])
perm.t.test(micros$wid[micros$Species=="Microscleromys sp."],micros$wid[micros$Locality=="TAR-31"])
[#### Non homogenous variances => Wilcox test]
##### Several groups - one factor
### Homogenous variances => ANOVA by permutation
perm.anova(micros$len~micros$Species)
pairwise.perm.t.test(micros$len,micros$Species)
perm.anova(micros$wid~micros$Species)
pairwise.perm.t.test(micros$wid,micros$Species)
[### Non homogenous variances => Kruskal-Wallis test]


###### Without size effect
ratio<-micros$len/micros$wid
micros1<-cbind(micros,ratio)
shapiro.test(micros1$ratio)
shapiro.test(micros1$ratio[micros1$Locality=="TAR-31"])
shapiro.test(micros1$ratio[micros1$Locality=="La_Venta"])
shapiro.test(micros1$ratio[micros1$Species=="Microscleromys paradoxalis"])
shapiro.test(micros1$ratio[micros1$Species=="Microscleromys cribriphilus"])
var.test(micros1$ratio~micros1$Locality)
var.test(micros1$ratio[micros1$Species=="Microscleromys"], micros1$ratio[micros1$Species=="Microscleromys paradoxalis"])
var.test(micros1$ratio[micros1$Species=="Microscleromys"], micros1$ratio[micros1$Species=="Microscleromys cribriphilus"])
var.test(micros1$ratio[micros1$Species=="Microscleromys paradoxalis"], micros1$ratio[micros1$Species=="Microscleromys cribriphilus"])
perm.var.test(micros1$ratio[micros1$Species=="Microscleromys"], micros1$ratio[micros1$Species=="Microscleromys sp."])
perm.var.test(micros1$ratio[micros1$Species=="Microscleromys sp."], micros1$ratio[micros1$Species=="Microscleromys cribriphilus"])
perm.var.test(micros1$ratio[micros1$Species=="Microscleromys sp."], micros1$ratio[micros1$Species=="Microscleromys paradoxalis"])
bartels.test(micros1$ratio)
bartels.test(micros1$ratio[micros1$Locality=="TAR-31"])
mk.test(micros1$ratio, alternative = "two.sided", continuity = TRUE) 
mk.test(micros1$ratio[micros1$Locality=="TAR-31"], alternative = "two.sided", continuity = TRUE) 
mk.test(micros1$ratio[micros1$Locality=="La_Venta"], alternative = "two.sided", continuity = TRUE) 
mk.test(micros1$ratio[micros1$Species=="Microscleromys paradoxalis"], alternative = "two.sided", continuity = TRUE) 
mk.test(micros1$ratio[micros1$Species=="Microscleromys cribriphilus"], alternative = "two.sided", continuity = TRUE) 

t.test(micros1$ratio~micros1$Locality,var.equal=FALSE)
t.test(micros1$ratio[micros1$Species=="Microscleromys paradoxalis"],micros$len[micros$Locality=="TAR-31"],var.equal=TRUE)
t.test(micros1$ratio[micros1$Species=="Microscleromys paradoxalis"],micros1$ratio[micros1$Species=="Microscleromys cribriphilus"],var.equal=TRUE)
t.test(micros1$ratio[micros1$Species=="Microscleromys cribriphilus"],micros1$ratio[micros1$Locality=="TAR-31"],var.equal=FALSE)
perm.t.test(micros1$ratio[micros1$Species=="Microscleromys paradoxalis"],micros1$ratio[micros1$Species=="Microscleromys sp."])
perm.t.test(micros1$ratio[micros1$Species=="Microscleromys sp."],micros1$ratio[micros1$Species=="Microscleromys cribriphilus"])
perm.t.test(micros1$ratio[micros1$Species=="Microscleromys sp."],micros1$ratio[micros1$Locality=="TAR-31"])


########### Partition analyses
########## Kmeans
######### len
al<-vector(mode="numeric")
projlen<-micros$len
for(i in 2:30)
{ml<-kmeans(projlen,i)
al<-append(al,ml$betweenss)}
plot(2:30,al)
######### wid
aw<-vector(mode="numeric")
projwid<-micros$wid
for(i in 2:30)
{mw<-kmeans(projwid,i)
aw<-append(aw,mw$betweenss)}
plot(2:30,aw)
########## s k-medoids (ou Partitioning Around Medoids, PAM)
Dl<-dist(projlen, method="euclidian")
Dw<-dist(projwid, method="euclidian")
########## Model 1 - 2 groups
projlen<-micros$len
projwid<-micros$wid
mod1lenk<-kmeans(projlen,2)
mod1widk<-kmeans(projwid,2)
microsMod<-cbind(micros,mod1lenk$cluster)
mod1lenp<-pam(Dl, 2)
mod1widp<-pam(Dw, 2)
microsMod<-cbind(microsMod,mod1lenp$clustering)
microsMod<-cbind(microsMod,mod1widk$cluster)
microsMod<-cbind(microsMod,mod1widp$clustering)
########## Model 2 - 3 groups
mod2lenk<-kmeans(projlen,3)
mod2widk<-kmeans(projwid,3)
microsMod<-cbind(microsMod,mod2lenk$cluster)
mod2lenp<-pam(Dl, 3)
mod2widp<-pam(Dw, 3)
microsMod<-cbind(microsMod,mod2lenp$clustering)
microsMod<-cbind(microsMod,mod2widk$cluster)
microsMod<-cbind(microsMod,mod2widp$clustering)
########## Model 3 - 4 groups
mod3lenk<-kmeans(projlen,4)
mod3widk<-kmeans(projwid,4)
microsMod<-cbind(microsMod,mod3lenk$cluster)
mod3lenp<-pam(Dl, 4)
mod3widp<-pam(Dw, 4)
microsMod<-cbind(microsMod,mod3lenp$clustering)
microsMod<-cbind(microsMod,mod3widk$cluster)
microsMod<-cbind(microsMod,mod3widp$clustering)
########## Model 4 - 5 groups
mod4lenk<-kmeans(projlen,5)
mod4widk<-kmeans(projwid,5)
microsMod<-cbind(microsMod,mod4lenk$cluster)
mod4lenp<-pam(Dl, 5)
mod4widp<-pam(Dw, 5)
microsMod<-cbind(microsMod,mod4lenp$clustering)
microsMod<-cbind(microsMod,mod4widk$cluster)
microsMod<-cbind(microsMod,mod4widp$clustering)
########## Model 5 - 6 groups
mod5lenk<-kmeans(projlen,6)
mod5widk<-kmeans(projwid,6)
microsMod<-cbind(microsMod,mod5lenk$cluster)
mod5lenp<-pam(Dl, 6)
mod5widp<-pam(Dw, 6)
microsMod<-cbind(microsMod,mod5lenp$clustering)
microsMod<-cbind(microsMod,mod5widk$cluster)
microsMod<-cbind(microsMod,mod5widp$clustering)
########## Model 6 - 7 groups
mod6lenk<-kmeans(projlen,7)
mod6widk<-kmeans(projwid,7)
microsMod<-cbind(microsMod,mod6lenk$cluster)
mod6lenp<-pam(Dl, 7)
mod6widp<-pam(Dw, 7)
microsMod<-cbind(microsMod,mod6lenp$clustering)
microsMod<-cbind(microsMod,mod6widk$cluster)
microsMod<-cbind(microsMod,mod6widp$clustering)
########## Model 7 - 8 groups
mod7lenk<-kmeans(projlen,8)
mod7widk<-kmeans(projwid,8)
microsMod<-cbind(microsMod,mod7lenk$cluster)
mod7lenp<-pam(Dl, 8)
mod7widp<-pam(Dw, 8)
microsMod<-cbind(microsMod,mod7lenp$clustering)
microsMod<-cbind(microsMod,mod7widk$cluster)
microsMod<-cbind(microsMod,mod7widp$clustering)
########## Model 8 - 9 groups
mod8lenk<-kmeans(projlen,9)
mod8widk<-kmeans(projwid,9)
microsMod<-cbind(microsMod,mod8lenk$cluster)
mod8lenp<-pam(Dl, 9)
mod8widp<-pam(Dw, 9)
microsMod<-cbind(microsMod,mod8lenp$clustering)
microsMod<-cbind(microsMod,mod8widk$cluster)
microsMod<-cbind(microsMod,mod8widp$clustering)
########## Model 9 - 10 groups
mod9lenk<-kmeans(projlen,10)
mod9widk<-kmeans(projwid,10)
microsMod<-cbind(microsMod,mod9lenk$cluster)
mod9lenp<-pam(Dl, 10)
mod9widp<-pam(Dw, 10)
microsMod<-cbind(microsMod,mod9lenp$clustering)
microsMod<-cbind(microsMod,mod9widk$cluster)
microsMod<-cbind(microsMod,mod9widp$clustering)
########## Model 10 - 11 groups
mod10lenk<-kmeans(projlen,11)
mod10widk<-kmeans(projwid,11)
microsMod<-cbind(microsMod,mod10lenk$cluster)
mod10lenp<-pam(Dl, 11)
mod10widp<-pam(Dw, 11)
microsMod<-cbind(microsMod,mod10lenp$clustering)
microsMod<-cbind(microsMod,mod10widk$cluster)
microsMod<-cbind(microsMod,mod10widp$clustering)
########## Model 11 - 12 groups
mod11lenk<-kmeans(projlen,12)
mod11widk<-kmeans(projwid,12)
microsMod<-cbind(microsMod,mod11lenk$cluster)
mod11lenp<-pam(Dl, 12)
mod11widp<-pam(Dw, 12)
microsMod<-cbind(microsMod,mod11lenp$clustering)
microsMod<-cbind(microsMod,mod11widk$cluster)
microsMod<-cbind(microsMod,mod11widp$clustering)
########## Model 12 - 13 groups
mod12lenk<-kmeans(projlen,13)
mod12widk<-kmeans(projwid,13)
microsMod<-cbind(microsMod,mod12lenk$cluster)
mod12lenp<-pam(Dl, 13)
mod12widp<-pam(Dw, 13)
microsMod<-cbind(microsMod,mod12lenp$clustering)
microsMod<-cbind(microsMod,mod12widk$cluster)
microsMod<-cbind(microsMod,mod12widp$clustering)
########## Model 13 - 14 groups
mod13lenk<-kmeans(projlen,14)
mod13widk<-kmeans(projwid,14)
microsMod<-cbind(microsMod,mod13lenk$cluster)
mod13lenp<-pam(Dl, 14)
mod13widp<-pam(Dw, 14)
microsMod<-cbind(microsMod,mod13lenp$clustering)
microsMod<-cbind(microsMod,mod13widk$cluster)
microsMod<-cbind(microsMod,mod13widp$clustering)
########## Model 14 - 15 groups
mod14lenk<-kmeans(projlen,15)
mod14widk<-kmeans(projwid,15)
microsMod<-cbind(microsMod,mod14lenk$cluster)
mod14lenp<-pam(Dl, 15)
mod14widp<-pam(Dw, 15)
microsMod<-cbind(microsMod,mod14lenp$clustering)
microsMod<-cbind(microsMod,mod14widk$cluster)
microsMod<-cbind(microsMod,mod14widp$clustering)
write.csv(microsMod, file="microsModPartition.txt")
########## Partition analyses with teeth with a similar degree of wear
setwd("E:/Recherche/Publis/Boivin&al,202X_TAR-31&La Venta/Stat/Tout/m1-2/StatesWear")
micros<-read.table("Stat_m1-2_reduced.txt", header=T, dec=",", sep= "\t")
######### Kmeans
######## len
al<-vector(mode="numeric")
projlen<-micros$len
for(i in 2:30)
{ml<-kmeans(projlen,i)
al<-append(al,ml$betweenss)}
plot(2:30,al)
######## wid
aw<-vector(mode="numeric")
projwid<-micros$wid
for(i in 2:30)
{mw<-kmeans(projwid,i)
aw<-append(aw,mw$betweenss)}
plot(2:30,aw)


############ Model analyses
rm(list=ls()) 
install.packages("MASS")
library(MASS)

# Open data
setwd("E:/Recherche/Publis/Boivin&al,202X_TAR-31&La Venta/Stat/Tout/m1-2/Models")
med<-read.table("microsMod_m1-2.txt", header=T, dec=",", sep= "\t")

head(med)
# Check the data structure
str(med)
# Accomodate it
len=as.numeric(med$len)
wid=as.numeric(med$wid)
Mod1=as.factor(med$Mod1)
Mod2=as.factor(med$Mod2)
Mod3=as.factor(med$Mod3)
Mod4=as.factor(med$Mod4)
Mod5=as.factor(med$Mod5)
Mod6=as.factor(med$Mod6)
Mod7=as.factor(med$Mod7)
Mod8=as.factor(med$Mod8)
Mod9=as.factor(med$Mod9)
Mod10=as.factor(med$Mod10)
Mod11=as.factor(med$Mod11)
Mod12=as.factor(med$Mod12)
Mod13=as.factor(med$Mod13)
Mod14=as.factor(med$Mod14)
Mod15=as.factor(med$Mod15)
Mod16=as.factor(med$Mod16)
Mod17=as.factor(med$Mod17)
Mod18=as.factor(med$Mod18)
Mod19=as.factor(med$Mod19)
Mod20=as.factor(med$Mod20)
Mod21=as.factor(med$Mod21)
Mod22=as.factor(med$Mod22)
Mod23=as.factor(med$Mod23)
Mod24=as.factor(med$Mod24)
Mod25=as.factor(med$Mod25)
Mod26=as.factor(med$Mod26)
Mod27=as.factor(med$Mod27)
Mod28=as.factor(med$Mod28)
Mod29=as.factor(med$Mod29)
Mod30=as.factor(med$Mod30)
Mod31=as.factor(med$Mod31)
Mod32=as.factor(med$Mod32)
Mod33=as.factor(med$Mod33)
Mod34=as.factor(med$Mod34)
Mod35=as.factor(med$Mod35)
Mod36=as.factor(med$Mod36)
Mod37=as.factor(med$Mod37)
Mod38=as.factor(med$Mod38)
Mod39=as.factor(med$Mod39)
Mod40=as.factor(med$Mod40)
Mod41=as.factor(med$Mod41)
Mod42=as.factor(med$Mod42)
Mod43=as.factor(med$Mod43)
Mod44=as.factor(med$Mod44)
Mod45=as.factor(med$Mod45)
Mod46=as.factor(med$Mod46)
Mod47=as.factor(med$Mod47)
Mod48=as.factor(med$Mod48)
Mod49=as.factor(med$Mod49)
Mod50=as.factor(med$Mod50)
Mod51=as.factor(med$Mod51)
locality=as.factor(med$Locality)

med=data.frame(len,wid,Mod2,Mod3,Mod4,Mod5,Mod6,Mod7,Mod8,Mod9,Mod10,Mod11,Mod12,Mod13,Mod14,Mod15,Mod16,Mod17,Mod18,Mod19,Mod20,Mod21,Mod22,Mod23,Mod24,Mod25,Mod26,Mod27,Mod28,Mod29,Mod30,Mod31,Mod32,Mod33,Mod34,Mod35,Mod36,Mod37,Mod38,Mod39,Mod40,Mod41,Mod42,Mod43,Mod44,Mod45,Mod46,Mod47,Mod48,Mod49,Mod50,Mod51,locality)
str(med)

########### len
ml1 <- glm(len~1:locality, gaussian(link = "identity"), data=med)
ml2 <- glm(len~Mod2:locality,gaussian(link = "identity"), data=med)
ml3 <- glm(len~Mod3:locality,gaussian(link = "identity"), data=med)
ml4 <- glm(len~Mod4:locality,gaussian(link = "identity"), data=med)
ml5 <- glm(len~Mod5:locality,gaussian(link = "identity"), data=med)
ml6 <- glm(len~Mod6:locality,gaussian(link = "identity"), data=med)
ml7 <- glm(len~Mod7:locality,gaussian(link = "identity"),data=med)
ml8 <- glm(len~Mod8:locality,gaussian(link = "identity"), data=med)
ml9 <- glm(len~Mod9:locality,gaussian(link = "identity"), data=med)
ml10 <- glm(len~Mod10:locality,gaussian(link = "identity"), data=med)
ml11 <- glm(len~Mod11:locality,gaussian(link = "identity"), data=med)
ml12 <- glm(len~Mod12:locality,gaussian(link = "identity"), data=med)
ml13 <- glm(len~Mod13:locality,gaussian(link = "identity"), data=med)
ml14 <- glm(len~Mod14:locality,gaussian(link = "identity"), data=med)
ml15 <- glm(len~Mod15:locality,gaussian(link = "identity"), data=med)
ml16 <- glm(len~Mod16:locality,gaussian(link = "identity"), data=med)
ml17 <- glm(len~Mod17:locality,gaussian(link = "identity"), data=med)
ml18 <- glm(len~Mod18:locality,gaussian(link = "identity"), data=med)
ml19 <- glm(len~Mod19:locality,gaussian(link = "identity"), data=med)
ml20 <- glm(len~Mod20:locality,gaussian(link = "identity"), data=med)
ml21 <- glm(len~Mod21:locality,gaussian(link = "identity"), data=med)
ml22 <- glm(len~Mod22:locality,gaussian(link = "identity"), data=med)
ml23 <- glm(len~Mod23:locality,gaussian(link = "identity"), data=med)
ml24 <- glm(len~Mod24:locality, gaussian(link = "identity"), data=med)
ml25 <- glm(len~Mod25:locality,gaussian(link = "identity"), data=med)
ml26 <- glm(len~Mod26:locality,gaussian(link = "identity"), data=med)
ml27 <- glm(len~Mod27:locality,gaussian(link = "identity"), data=med)
ml28 <- glm(len~Mod28:locality,gaussian(link = "identity"), data=med)
ml29 <- glm(len~Mod29:locality,gaussian(link = "identity"), data=med)
ml30 <- glm(len~Mod30:locality,gaussian(link = "identity"),data=med)
ml31 <- glm(len~Mod31:locality,gaussian(link = "identity"), data=med)
ml32 <- glm(len~Mod32:locality,gaussian(link = "identity"), data=med)
ml33 <- glm(len~Mod33:locality,gaussian(link = "identity"), data=med)
ml34 <- glm(len~Mod34:locality,gaussian(link = "identity"), data=med)
ml35 <- glm(len~Mod35:locality,gaussian(link = "identity"), data=med)
ml36 <- glm(len~Mod36:locality,gaussian(link = "identity"), data=med)
ml37 <- glm(len~Mod37:locality,gaussian(link = "identity"), data=med)
ml38 <- glm(len~Mod38:locality,gaussian(link = "identity"), data=med)
ml39 <- glm(len~Mod39:locality,gaussian(link = "identity"), data=med)
ml40 <- glm(len~Mod40:locality,gaussian(link = "identity"), data=med)
ml41 <- glm(len~Mod41:locality,gaussian(link = "identity"), data=med)
ml42 <- glm(len~Mod42:locality,gaussian(link = "identity"), data=med)
ml43 <- glm(len~Mod43:locality,gaussian(link = "identity"), data=med)
ml44 <- glm(len~Mod44:locality,gaussian(link = "identity"), data=med)
ml45 <- glm(len~Mod45:locality,gaussian(link = "identity"), data=med)
ml46 <- glm(len~Mod46:locality,gaussian(link = "identity"), data=med)
ml47 <- glm(len~Mod47:locality,gaussian(link = "identity"), data=med)
ml48 <- glm(len~Mod48:locality,gaussian(link = "identity"), data=med)
ml49 <- glm(len~Mod49:locality,gaussian(link = "identity"), data=med)
ml50 <- glm(len~Mod50:locality,gaussian(link = "identity"), data=med)
ml51 <- glm(len~Mod51:locality,gaussian(link = "identity"), data=med)

aicc<-c(ml1$aic,ml2$aic,ml3$aic,ml4$aic,ml5$aic,ml6$aic,ml7$aic,ml8$aic,ml9$aic,ml10$aic,ml11$aic,ml12$aic,ml13$aic,ml14$aic,ml15$aic,ml16$aic,ml17$aic,ml18$aic,ml19$aic,ml20$aic,ml21$aic,ml22$aic,ml23$aic,ml24$aic,ml25$aic,ml26$aic,ml27$aic,ml28$aic,ml29$aic,ml30$aic,ml31$aic,ml32$aic,ml33$aic,ml34$aic,ml35$aic,ml36$aic,ml37$aic,ml38$aic,ml39$aic,ml40$aic,ml41$aic,ml42$aic,ml43$aic,ml44$aic,ml45$aic,ml46$aic,ml47$aic,ml48$aic,ml49$aic,ml50$aic,ml51$aic)
aiccD<-aicc-min(aicc)
aw<-exp(-0.5*aiccD)
aiccW<-aw/sum(aw)
aiccW
x<-cbind(aicc,aiccD,aiccW)
x<-data.frame(x)
write.table(x, 'AIClen_m1-2.txt',sep = ,row.names=TRUE, col.names=TRUE)

res <- aov(ml50) # model len 15 sp
summary(ml50)
summary(res)

########### wid
ml1 <- glm(wid~1:locality, gaussian(link = "identity"), data=med)
ml2 <- glm(wid~Mod2:locality,gaussian(link = "identity"), data=med)
ml3 <- glm(wid~Mod3:locality,gaussian(link = "identity"), data=med)
ml4 <- glm(wid~Mod4:locality,gaussian(link = "identity"), data=med)
ml5 <- glm(wid~Mod5:locality,gaussian(link = "identity"), data=med)
ml6 <- glm(wid~Mod6:locality,gaussian(link = "identity"), data=med)
ml7 <- glm(wid~Mod7:locality,gaussian(link = "identity"), data=med)
ml8 <- glm(wid~Mod8:locality,gaussian(link = "identity"), data=med)
ml9 <- glm(wid~Mod9:locality,gaussian(link = "identity"), data=med)
ml10 <- glm(wid~Mod10:locality,gaussian(link = "identity"), data=med)
ml11 <- glm(wid~Mod11:locality,gaussian(link = "identity"), data=med)
ml12 <- glm(wid~Mod12:locality,gaussian(link = "identity"), data=med)
ml13 <- glm(wid~Mod13:locality,gaussian(link = "identity"), data=med)
ml14 <- glm(wid~Mod14:locality,gaussian(link = "identity"), data=med)
ml15 <- glm(wid~Mod15:locality,gaussian(link = "identity"), data=med)
ml16 <- glm(wid~Mod16:locality,gaussian(link = "identity"), data=med)
ml17 <- glm(wid~Mod17:locality,gaussian(link = "identity"), data=med)
ml18 <- glm(wid~Mod18:locality,gaussian(link = "identity"), data=med)
ml19 <- glm(wid~Mod19:locality,gaussian(link = "identity"), data=med)
ml20 <- glm(wid~Mod20:locality,gaussian(link = "identity"), data=med)
ml21 <- glm(wid~Mod21:locality,gaussian(link = "identity"), data=med)
ml22 <- glm(wid~Mod22:locality,gaussian(link = "identity"),data=med)
ml23 <- glm(wid~Mod23:locality,gaussian(link = "identity"),data=med)
ml24 <- glm(wid~Mod24:locality, gaussian(link = "identity"), data=med)
ml25 <- glm(wid~Mod25:locality,gaussian(link = "identity"), data=med)
ml26 <- glm(wid~Mod26:locality,gaussian(link = "identity"), data=med)
ml27 <- glm(wid~Mod27:locality,gaussian(link = "identity"), data=med)
ml28 <- glm(wid~Mod28:locality,gaussian(link = "identity"), data=med)
ml29 <- glm(wid~Mod29:locality,gaussian(link = "identity"), data=med)
ml30 <- glm(wid~Mod30:locality,gaussian(link = "identity"),data=med)
ml31 <- glm(wid~Mod31:locality,gaussian(link = "identity"), data=med)
ml32 <- glm(wid~Mod32:locality,gaussian(link = "identity"), data=med)
ml33 <- glm(wid~Mod33:locality,gaussian(link = "identity"), data=med)
ml34 <- glm(wid~Mod34:locality,gaussian(link = "identity"), data=med)
ml35 <- glm(wid~Mod35:locality,gaussian(link = "identity"), data=med)
ml36 <- glm(wid~Mod36:locality,gaussian(link = "identity"), data=med)
ml37 <- glm(wid~Mod37:locality,gaussian(link = "identity"), data=med)
ml38 <- glm(wid~Mod38:locality,gaussian(link = "identity"), data=med)
ml39 <- glm(wid~Mod39:locality,gaussian(link = "identity"), data=med)
ml40 <- glm(wid~Mod40:locality,gaussian(link = "identity"), data=med)
ml41 <- glm(wid~Mod41:locality,gaussian(link = "identity"), data=med)
ml42 <- glm(wid~Mod42:locality,gaussian(link = "identity"), data=med)
ml43 <- glm(wid~Mod43:locality,gaussian(link = "identity"), data=med)
ml44 <- glm(wid~Mod44:locality,gaussian(link = "identity"), data=med)
ml45 <- glm(wid~Mod45:locality,gaussian(link = "identity"), data=med)
ml46 <- glm(wid~Mod46:locality,gaussian(link = "identity"), data=med)
ml47 <- glm(wid~Mod47:locality,gaussian(link = "identity"), data=med)
ml48 <- glm(wid~Mod48:locality,gaussian(link = "identity"), data=med)
ml49 <- glm(wid~Mod49:locality,gaussian(link = "identity"), data=med)
ml50 <- glm(wid~Mod50:locality,gaussian(link = "identity"), data=med)
ml51 <- glm(wid~Mod51:locality,gaussian(link = "identity"), data=med)

aicc<-c(ml1$aic,ml2$aic,ml3$aic,ml4$aic,ml5$aic,ml6$aic,ml7$aic,ml8$aic,ml9$aic,ml10$aic,ml11$aic,ml12$aic,ml13$aic,ml14$aic,ml15$aic,ml16$aic,ml17$aic,ml18$aic,ml19$aic,ml20$aic,ml21$aic,ml22$aic,ml23$aic,ml24$aic,ml25$aic,ml26$aic,ml27$aic,ml28$aic,ml29$aic,ml30$aic,ml31$aic,ml32$aic,ml33$aic,ml34$aic,ml35$aic,ml36$aic,ml37$aic,ml38$aic,ml39$aic,ml40$aic,ml41$aic,ml42$aic,ml43$aic,ml44$aic,ml45$aic,ml46$aic,ml47$aic,ml48$aic,ml49$aic,ml50$aic,ml51$aic)
aiccD<-aicc-min(aicc)
aw<-exp(-0.5*aiccD)
aiccW<-aw/sum(aw)
aiccW
x<-cbind(aicc,aiccD,aiccW)
x<-data.frame(x)
write.table(x, 'AICwid_m1-2.txt',sep = ,row.names=TRUE, col.names=TRUE)

res <- aov(ml51) # model wid 15 sp
summary(ml51)
summary(res)
