# Supplementary material for: Late middle Miocene caviomorph rodents from Tarapoto, Peruvian Amazonia
Source: PLoS One. 2021 Nov 3;16(11):e0258455. doi: 10.1371/journal.pone.0258455 (PMC8565788; doi:10.1371/journal.pone.0258455)
Supplement: S2 File — (ZIP) [file pone.0258455.s002.zip › S2_File/m1-2/Stat_m1-2.txt]

Numero	Loci	len	wid	Hlin	Hlab	Locality	Species
162	l m1?	1,563	1,275	NA	NA	TAR-31	Microscleromys
165	l m1?	1,479	1,308	NA	NA	TAR-31	Microscleromys
166	l m1?	1,548	1,266	1	1,201	TAR-31	Microscleromys
169	l m1?	1,655	1,355	0,883	0,887	TAR-31	Microscleromys
170	l m1?	1,678	1,364	NA	NA	TAR-31	Microscleromys
171	l m1?	1,785	1,416	NA	NA	TAR-31	Microscleromys
175	l m2?	1,858	1,531	1,032	1,03	TAR-31	Microscleromys
176	l m2?	1,811	1,598	NA	NA	TAR-31	Microscleromys
177	l m2?	2,019	1,73	NA	NA	TAR-31	Microscleromys
178	l m2?	1,843	1,83	1,076	1,336	TAR-31	Microscleromys
180	l m1?	1,431	1,208	NA	NA	TAR-31	Microscleromys
182	l m1?	1,416	1,271	NA	NA	TAR-31	Microscleromys
184	l m1?	1,535	1,442	NA	NA	TAR-31	Microscleromys
185	l m1?	1,496	1,232	NA	NA	TAR-31	Microscleromys
186	l m1?	1,442	1,381	NA	NA	TAR-31	Microscleromys
187	l m1?	1,535	1,325	NA	NA	TAR-31	Microscleromys
188	l m1?	1,561	1,392	0,926	1,013	TAR-31	Microscleromys
189	l m1?	1,637	1,308	1,136	1,071	TAR-31	Microscleromys
190	l m1?	1,639	1,44	NA	NA	TAR-31	Microscleromys
191	l m1?	1,717	1,414	NA	NA	TAR-31	Microscleromys
192	l m1?	1,472	1,208	NA	NA	TAR-31	Microscleromys
193	l m1?	1,349	1,156	1,013	1,069	TAR-31	Microscleromys
194	l m1?	1,505	1,221	1,078	1,154	TAR-31	Microscleromys
195	l m1?	1,509	1,162	NA	NA	TAR-31	Microscleromys
196	l m1?	1,485	1,238	NA	NA	TAR-31	Microscleromys
197	l m1?	1,581	1,275	NA	NA	TAR-31	Microscleromys
198	l m1?	1,585	1,353	NA	NA	TAR-31	Microscleromys
199	l m1?	1,598	1,388	0,8	1,073	TAR-31	Microscleromys
200	l m1?	1,622	1,459	NA	NA	TAR-31	Microscleromys
201	l m1?	1,707	1,414	NA	NA	TAR-31	Microscleromys
202	l m1?	1,685	1,407	1,199	1,203	TAR-31	Microscleromys
203	l m1?	1,7	1,488	NA	NA	TAR-31	Microscleromys
204	l m1?	1,722	1,498	NA	NA	TAR-31	Microscleromys
205	l m1?	1,767	1,49	NA	NA	TAR-31	Microscleromys
206	l m1?	1,594	1,409	NA	NA	TAR-31	Microscleromys
142	l m1	1,884	1,655	0,891	1,082	TAR-31	Microscleromys
207	r m1?	1,362	1,173	NA	NA	TAR-31	Microscleromys
209	r m1?	1,37	1,149	NA	NA	TAR-31	Microscleromys
211	r m1?	1,412	1,303	0,874	1,028	TAR-31	Microscleromys
212	r m1?	1,507	1,347	NA	NA	TAR-31	Microscleromys
213	r m1?	1,386	1,201	NA	NA	TAR-31	Microscleromys
214	r m1?	1,65	1,399	NA	NA	TAR-31	Microscleromys
215	r m1?	1,459	1,338	NA	NA	TAR-31	Microscleromys
216	r m1?	1,605	1,366	NA	NA	TAR-31	Microscleromys
217	r m1?	1,57	1,375	NA	NA	TAR-31	Microscleromys
218	r m1?	1,642	1,475	0,909	0,945	TAR-31	Microscleromys
219	r m2?	1,902	1,557	1,041	0,924	TAR-31	Microscleromys
220	r m2?	1,685	1,488	NA	NA	TAR-31	Microscleromys
221	r m2?	1,782	1,572	NA	NA	TAR-31	Microscleromys
222	r m2?	1,511	1,531	NA	NA	TAR-31	Microscleromys
223	r m2?	1,947	1,672	1,01	1,18	TAR-31	Microscleromys
224	r m2?	1,735	1,546	NA	NA	TAR-31	Microscleromys
226	r m2?	1,824	1,583	NA	NA	TAR-31	Microscleromys
227	r m2?	1,869	1,501	NA	NA	TAR-31	Microscleromys
229	r m	1,375	1,392	NA	NA	TAR-31	Microscleromys
233	r m1?	1,579	1,264	0,911	1,006	TAR-31	Microscleromys
234	r m1?	1,572	1,303	1,13	1,082	TAR-31	Microscleromys
236	r m1?	1,75	1,431	NA	NA	TAR-31	Microscleromys
237	r m1?	1,592	1,446	NA	NA	TAR-31	Microscleromys
IGM-DU 88-807	l m1 or m2	1,85	1,63	NA	NA	La_Venta	Microscleromys paradoxalis
IGM-DU 88-814	l m1 or m2	2,05	1,71	NA	NA	La_Venta	Microscleromys paradoxalis
IGM-DU 88-819	r m1 or m2	1,95	1,8	NA	NA	La_Venta	Microscleromys paradoxalis
IGM-DU 89-675	l m1 or m2	1,73	1,68	NA	NA	La_Venta	Microscleromys paradoxalis
IGM-DU 88-788	l m1 or m2	2,1	1,49	NA	NA	La_Venta	Microscleromys cribriphilus
IGM-DU 88-803	r m1 or m2	1,79	1,44	NA	NA	La_Venta	Microscleromys cribriphilus
IGM-DU 89-676	l p4	1,69	1,62	NA	NA	La_Venta	Microscleromys cribriphilus
ING-KU 8604	right m1	1,92	1,7	NA	NA	La_Venta	Microscleromys sp.
ING-KU 8604	right m2	1,85	1,57	NA	NA	La_Venta	Microscleromys sp.
