# Supplementary material for: Late middle Miocene caviomorph rodents from Tarapoto, Peruvian Amazonia
Source: PLoS One. 2021 Nov 3;16(11):e0258455. doi: 10.1371/journal.pone.0258455 (PMC8565788; doi:10.1371/journal.pone.0258455)
Supplement: S2 File — (ZIP) [file pone.0258455.s002.zip › S2_File/M1-2s/Models/microsMod_M1-2s.txt]

Numero	Loci	len	wid	Locality	Species	Mod1	Mod2	Mod3	Mod4	Mod5	Mod6	Mod7	Mod8	Mod9	Mod10	Mod11	Mod12	Mod13	Mod14	Mod15	Mod16	Mod17	Mod18	Mod19	Mod20	Mod21	Mod22	Mod23	Mod24	Mod25	Mod26	Mod27	Mod28	Mod29	Mod30	Mod31	Mod32	Mod33	Mod34	Mod35	Mod36	Mod37	Mod38	Mod39
no number (among P4)	l M1 or M2?	1.41	1.648	TAR-31	Microscleromys	MW	M	M	M1	M1	M1	M1	M1W1	M1W2	M1W1	M1W2	LP1	WP1	LP1	WP1	LP1	WP1	LP1	WP1	LP1	WP1	LP1	WP1	LP1	WP1	LP1	WP1	LP1	WP1	LP1	WP1	LP1	WP1	LP1	WP1	LP1	WP1	LP1	WP1
59	l M1 or M2?	1.557	1.554	TAR-31	Microscleromys	MW	M	M	M2	M2	M2W1	M2W2	M2	M2	M2W2	M2W1	LP1	WP1	LP2	WP2	LP2	WP2	LP2	WP2	LP2	WP2	LP2	WP2	LP2	WP2	LP2	WP2	LP2	WP2	LP2	WP2	LP2	WP2	LP2	WP2	LP2	WP2	LP2	WP2
61	l M1 or M2?	1.608	1.553	TAR-31	Microscleromys	MW	M	M	M2	M2	M2W1	M2W2	M2	M2	M2W2	M2W1	LP2	WP1	LP2	WP2	LP2	WP2	LP2	WP2	LP3	WP2	LP3	WP2	LP3	WP2	LP3	WP2	LP3	WP2	LP3	WP2	LP3	WP2	LP3	WP2	LP3	WP2	LP3	WP2
62	l M1 or M2?	1.678	1.46	TAR-31	Microscleromys	MW	M	M	M2	M2	M2W1	M2W2	M2	M2	M2W2	M2W1	LP2	WP2	LP3	WP3	LP3	WP3	LP3	WP3	LP4	WP3	LP4	WP3	LP4	WP3	LP4	WP3	LP4	WP3	LP4	WP3	LP4	WP3	LP4	WP3	LP4	WP3	LP4	WP3
69	l M1 or M2?	1.709	1.544	TAR-31	Microscleromys	MW	M	M	M2	M2	M2W1	M2W2	M2	M2	M2W2	M2W1	LP2	WP1	LP3	WP2	LP3	WP2	LP3	WP2	LP4	WP2	LP4	WP2	LP5	WP2	LP5	WP2	LP5	WP2	LP5	WP2	LP5	WP2	LP5	WP2	LP5	WP2	LP5	WP2
70	l M1 or M2?	1.611	1.66	TAR-31	Microscleromys	MW	M	M	M2	M2	M2W1	M2W2	M2	M2	M2W2	M2W1	LP2	WP1	LP2	WP1	LP2	WP1	LP2	WP1	LP3	WP1	LP3	WP1	LP3	WP1	LP3	WP1	LP3	WP1	LP3	WP1	LP3	WP1	LP3	WP1	LP3	WP1	LP3	WP1
71	l M1 or M2?	1.71	1.589	TAR-31	Microscleromys	MW	M	M	M2	M2	M2W1	M2W2	M2	M2	M2W2	M2W1	LP2	WP1	LP3	WP2	LP3	WP2	LP3	WP2	LP4	WP2	LP4	WP2	LP5	WP2	LP5	WP4	LP5	WP4	LP5	WP4	LP5	WP4	LP5	WP4	LP5	WP4	LP5	WP4
72	l M2?	1.875	1.807	TAR-31	Microscleromys	MW	M	M	M2	M2	M2W1	M2W2	M2	M2	M2W2	M2W1	LP2	WP1	LP3	WP1	LP3	WP1	LP4	WP4	LP5	WP4	LP5	WP4	LP6	WP4	LP6	WPWP5	LP6	WP5	LP6	WP5	LP6	WP5	LP6	WP5	LP6	WP5	LP6	WP5
73	l M2?	1.725	1.715	TAR-31	Microscleromys	MW	M	M	M2	M2	M2W1	M2W2	M2	M2	M2W2	M2W1	LP2	WP1	LP3	WP1	LP3	WP1	LP3	WP1	LP4	WP5	LP4	WP5	LP5	WP5	LP5	WP6	LP5	WP6	LP5	WP6	LP7	WP6	LP7	WP6	LP7	WP6	LP7	WP6
74	l M2?	1.717	1.742	TAR-31	Microscleromys	MW	M	M	M2	M2	M2W1	M2W2	M2	M2	M2W2	M2W1	LP2	WP1	LP3	WP1	LP3	WP1	LP3	WP4	LP4	WP4	LP4	WP4	LP5	WP4	LP5	WPWP5	LP5	WP5	LP5	WP5	LP5	WP6	LP5	WP6	LP5	WP6	LP5	WP7
76	l M1 or M2?	1.499	1.339	TAR-31	Microscleromys	MW	M	M	M1	M1	M1	M1	M1W1	M1W2	M1W1	M1W2	LP1	WP2	LP2	WP3	LP4	WP4	LP5	WP5	LP6	WP6	LP6	WP6	LP7	WP6	LP7	WP7	LP7	WP7	LP7	WP7	LP8	WP7	LP8	WP7	LP8	WP7	LP8	WP8
78	l M1 or M2?	1.455	1.613	TAR-31	Microscleromys	MW	M	M	M1	M1	M1	M1	M1W1	M1W2	M1W1	M1W2	LP1	WP1	LP1	WP2	LP4	WP2	LP5	WP2	LP6	WP1	LP1	WP1	LP1	WP1	LP1	WP1	LP8	WP1	LP8	WP8	LP9	WP8	LP9	WP8	LP9	WP8	LP9	WP9
79	l M1 or M2?	1.5	1.311	TAR-31	Microscleromys	MW	M	M	M1	M1	M1	M1	M1W1	M1W2	M1W1	M1W2	LP1	WP2	LP2	WP3	LP4	WP4	LP5	WP5	LP6	WP6	LP6	WP7	LP7	WP7	LP7	WP8	LP7	WP8	LP7	WP9	LP8	WP9	LP8	WP9	LP8	WP9	LP8	WP10
80	l M1 or M2?	1.371	1.411	TAR-31	Microscleromys	MW	M	M	M1	M1	M1	M1	M1W1	M1W2	M1W1	M1W2	LP1	WP2	LP1	WP3	LP1	WP3	LP1	WP3	LP1	WP3	LP7	WP3	LP8	WP3	LP8	WP3	LP1	WP9	LP1	WP10	LP1	WP10	LP1	WP10	LP10	WP10	LP10	WP11
81	l M1 or M2?	1.521	1.58	TAR-31	Microscleromys	MW	M	M	M1	M1	M1	M1	M1W1	M1W2	M1W1	M1W2	LP1	WP1	LP2	WP2	LP4	WP2	LP5	WP2	LP6	WP2	LP6	WP2	LP7	WP2	LP7	WP4	LP7	WP4	LP7	WP4	LP8	WP4	LP8	WP4	LP8	WP4	LP11	WP4
84	l M1 or M2?	1.562	1.511	TAR-31	Microscleromys	MW	M	M	M2	M2	M2W1	M2W2	M2	M2	M2W2	M2W1	LP1	WP1	LP2	WP2	LP2	WP2	LP2	WP2	LP2	WP2	LP2	WP2	LP2	WP8	LP2	WP9	LP2	WP10	LP2	WP11	LP2	WP11	LP2	WP11	LP2	WP11	LP2	WP12
85	l M1 or M2?	1.473	1.702	TAR-31	Microscleromys	MW	M	M	M1	M1	M1	M1	M1W1	M1W2	M1W1	M1W2	LP1	WP1	LP2	WP1	LP4	WP1	LP5	WP1	LP6	WP5	LP1	WP5	LP1	WP5	LP1	WP6	LP8	WP6	LP8	WP6	LP9	WP1WP2	LP9	WP12	LP9	WP12	LP9	WP13
86	l M1 or M2?	1.671	1.568	TAR-31	Microscleromys	MW	M	M	M2	M2	M2W1	M2W2	M2	M2	M2W2	M2W1	LP2	WP1	LP3	WP2	LP3	WP2	LP3	WP2	LP4	WP2	LP4	WP2	LP4	WP2	LP4	WP4	LP4	WP4	LP4	WP4	LP4	WP4	LP4	WP4	LP4	WP4	LP4	WP4
87	l M1 or M2?	1.576	1.444	TAR-31	Microscleromys	MW	M	M	M2	M2	M2W1	M2W2	M2	M2	M2W2	M2W1	LP1	WP2	LP2	WP3	LP2	WP3	LP2	WP3	LP2	WP3	LP2	WP3	LP2	WP3	LP2	WP3	LP2	WP3	LP2	WP3	LP2	WP3	LP2	WP3	LP2	WP3	LP2	WP3
88	l M1 or M2?	1.653	1.508	TAR-31	Microscleromys	MW	M	M	M2	M2	M2W1	M2W2	M2	M2	M2W2	M2W1	LP2	WP1	LP3	WP2	LP2	WP2	LP3	WP2	LP3	WP2	LP3	WP2	LP4	WP8	LP4	WP9	LP4	WP10	LP4	WP11	LP4	WP11	LP4	WP11	LP4	WP11	LP4	WP12
89	l M1 or M2?	1.573	1.486	TAR-31	Microscleromys	MW	M	M	M2	M2	M2W1	M2W2	M2	M2	M2W2	M2W1	LP1	WP1	LP2	WP2	LP2	WP3	LP2	WP3	LP2	WP3	LP2	WP3	LP2	WP8	LP2	WP9	LP2	WP10	LP2	WP11	LP2	WP11	LP2	WP11	LP2	WP11	LP2	WP12
92	l M1 or M2?	1.356	1.356	TAR-31	Microscleromys	MW	M	M	M1	M1	M1	M1	M1W1	M1W2	M1W1	M1W2	LP1	WP2	LP1	WP3	LP1	WP4	LP1	WP5	LP1	WP6	LP7	WP6	LP8	WP6	LP8	WP7	LP1	WP7	LP9	WP7	LP10	WP7	LP10	WP7	LP11	WP7	LP12	WP8
102	r M1 or M2?	1.356	1.442	TAR-31	Microscleromys	MW	M	M	M1	M1	M1	M1	M1W1	M1W2	M1W1	M1W2	LP1	WP2	LP1	WP3	LP1	WP3	LP1	WP3	LP1	WP3	LP7	WP3	LP8	WP3	LP8	WP3	LP1	WP3	LP9	WP3	LP10	WP3	LP10	WP3	LP11	WP3	LP12	WP3
104	r M1 or M2?	1.594	1.376	TAR-31	Microscleromys	MW	M	M	M2	M2	M2W1	M2W2	M2	M2	M2W2	M2W1	LP2	WP2	LP2	WP3	LP2	WP4	LP2	WP5	LP3	WP6	LP3	WP6	LP3	WP6	LP3	WP7	LP3	WP7	LP3	WP7	LP3	WP7	LP3	WP7	LP3	WP7	LP3	WP8
110	r M1 or M2?	1.595	1.424	TAR-31	Microscleromys	MW	M	M	M2	M2	M2W1	M2W2	M2	M2	M2W2	M2W1	LP2	WP2	LP2	WP3	LP2	WP3	LP2	WP3	LP3	WP3	LP3	WP3	LP3	WP3	LP3	WP3	LP3	WP9	LP3	WP10	LP3	WP10	LP3	WP10	LP3	WP10	LP3	WP11
111	r M1 or M2?	1.463	1.554	TAR-31	Microscleromys	MW	M	M	M1	M1	M1	M1	M1W1	M1W2	M1W1	M1W2	LP1	WP1	LP1	WP2	LP4	WP2	LP5	WP2	LP6	WP2	LP1	WP2	LP1	WP2	LP1	WP2	LP8	WP2	LP8	WP2	LP9	WP2	LP9	WP2	LP9	WP2	LP9	WP2
112	r M1 or M2?	1.636	1.579	TAR-31	Microscleromys	MW	M	M	M2	M2	M2W1	M2W2	M2	M2	M2W2	M2W1	LP2	WP1	LP2	WP2	LP2	WP2	LP2	WP2	LP3	WP2	LP3	WP2	LP3	WP2	LP3	WP4	LP3	WP4	LP3	WP4	LP3	WP4	LP3	WP4	LP3	WP4	LP3	WP4
113	r M1 or M2?	1.61	1.687	TAR-31	Microscleromys	MW	M	M	M2	M2	M2W1	M2W2	M2	M2	M2W2	M2W1	LP2	WP1	LP2	WP1	LP2	WP1	LP2	WP1	LP3	WP5	LP3	WP5	LP3	WP5	LP3	WP6	LP3	WP6	LP3	WP6	LP3	WP1WP2	LP3	WP12	LP3	WP12	LP3	WP13
114	r M1 or M2?	1.714	1.534	TAR-31	Microscleromys	MW	M	M	M2	M2	M2W1	M2W2	M2	M2	M2W2	M2W1	LP2	WP1	LP3	WP2	LP3	WP2	LP3	WP2	LP4	WP2	LP4	WP2	LP5	WP2	LP5	WP2	LP5	WP2	LP5	WP2	LP5	WP2	LP5	WP2	LP5	WP2	LP5	WP2
115	r M1 or M2?	1.829	1.539	TAR-31	Microscleromys	MW	M	M	M2	M2	M2W1	M2W2	M2	M2	M2W2	M2W1	LP2	WP1	LP3	WP2	LP3	WP2	LP4	WP2	LP5	WP2	LP5	WP2	LP6	WP2	LP9	WP2	LP9	WP2	LP10	WP2	LP11	WP2	LP11	WP2	LP12	WP2	LP13	WP2
116	r M1 or M2?	1.702	1.637	TAR-31	Microscleromys	MW	M	M	M2	M2	M2W1	M2W2	M2	M2	M2W2	M2W1	LP2	WP1	LP3	WP1	LP3	WP1	LP3	WP1	LP4	WP1	LP4	WP1	LP5	WP1	LP5	WP1	LP5	WP1	LP5	WP1	LP5	WP1	LP5	WP1	LP5	WP1	LP5	WP1
117	r M1 or M2?	1.348	1.275	TAR-31	Microscleromys	MW	M	M	M1	M1	M1	M1	M1W1	M1W2	M1W1	M1W2	LP1	WP2	LP1	WP3	LP1	WP4	LP1	WP5	LP1	WP6	LP7	WP7	LP8	WP7	LP8	WP8	LP1	WP8	LP9	WP9	LP10	WP9	LP10	WP9	LP11	WP13	LP12	WP14
121	r M1 or M2?	1.514	1.514	TAR-31	Microscleromys	MW	M	M	M1	M1	M1	M1	M1W1	M1W2	M1W1	M1W2	LP1	WP1	LP2	WP2	LP4	WP2	LP5	WP2	LP6	WP2	LP6	WP2	LP7	WP8	LP7	WP9	LP7	WP10	LP7	WP11	LP8	WP11	LP8	WP11	LP8	WP11	LP11	WP12
122	r M1 or M2?	1.496	1.287	TAR-31	Microscleromys	MW	M	M	M1	M1	M1	M1	M1W1	M1W2	M1W1	M1W2	LP1	WP2	LP2	WP3	LP4	WP4	LP5	WP5	LP6	WP6	LP6	WP7	LP7	WP7	LP7	WP8	LP7	WP8	LP7	WP9	LP8	WP9	LP8	WP9	LP8	WP13	LP8	WP14
123	r M1 or M2?	1.363	1.352	TAR-31	Microscleromys	MW	M	M	M1	M1	M1	M1	M1W1	M1W2	M1W1	M1W2	LP1	WP2	LP1	WP3	LP1	WP4	LP1	WP5	LP1	WP6	LP7	WP6	LP8	WP6	LP8	WP7	LP1	WP7	LP9	WP7	LP10	WP7	LP10	WP7	LP11	WP7	LP12	WP8
124	r M1 or M2?	1.373	1.355	TAR-31	Microscleromys	MW	M	M	M1	M1	M1	M1	M1W1	M1W2	M1W1	M1W2	LP1	WP2	LP1	WP3	LP1	WP4	LP1	WP5	LP1	WP6	LP7	WP6	LP8	WP6	LP8	WP7	LP1	WP7	LP1	WP7	LP1	WP7	LP1	WP7	LP10	WP7	LP10	WP8
125	r M1 or M2?	1.437	1.448	TAR-31	Microscleromys	MW	M	M	M1	M1	M1	M1	M1W1	M1W2	M1W1	M1W2	LP1	WP2	LP1	WP3	LP4	WP3	LP5	WP3	LP6	WP3	LP1	WP3	LP1	WP3	LP1	WP3	LP8	WP3	LP8	WP3	LP9	WP3	LP9	WP3	LP9	WP3	LP9	WP3
126	r M1 or M2?	1.295	1.416	TAR-31	Microscleromys	MW	M	M	M1	M1	M1	M1	M1W1	M1W2	M1W1	M1W2	LP1	WP2	LP1	WP3	LP1	WP3	LP1	WP3	LP1	WP3	LP7	WP3	LP8	WP3	LP8	WP3	LP10	WP9	LP11	WP10	LP1LP2	WP10	LP12	WP10	LP13	WP10	LP14	WP11
127	r M1 or M2?	1.504	1.615	TAR-31	Microscleromys	MW	M	M	M1	M1	M1	M1	M1W1	M1W2	M1W1	M1W2	LP1	WP1	LP2	WP2	LP4	WP2	LP5	WP2	LP6	WP1	LP6	WP1	LP7	WP1	LP7	WP1	LP7	WP1	LP7	WP8	LP8	WP8	LP8	WP8	LP8	WP8	LP8	WP9
128	r M	1.381	1.548	TAR-31	Microscleromys	MW	M	M	M1	M1	M1	M1	M1W1	M1W2	M1W1	M1W2	LP1	WP1	LP1	WP2	LP1	WP2	LP1	WP2	LP1	WP2	LP7	WP2	LP8	WP2	LP8	WP2	LP1	WP2	LP1	WP2	LP1	WP2	LP1	WP2	LP10	WP2	LP10	WP2
225	r M1 or M2?	1.919	1.782	TAR-31	Microscleromys	MW	M	M	M2	M2	M2W1	M2W2	M2	M2	M2W2	M2W1	LP2	WP1	LP3	WP1	LP3	WP1	LP4	WP4	LP5	WP4	LP5	WP4	LP6	WP4	LP6	WPWP5	LP6	WP5	LP6	WP5	LP6	WP5	LP1LP3	WP1WP3	LP1LP4	WP1WP4	LP15	WP15
IGM-DU 88-821	r M1 or M2	1.76	1.78	La_Venta	Microscleromys paradoxalis	MW	W	W1	W	W1	M2W1	W1	M1W1	W1	M1W1	M2W1	LP2	WP1	LP3	WP1	LP3	WP1	LP3	WP4	LP4	WP4	LP4	WP4	LP5	WP4	LP5	WPWP5	LP5	WP5	LP5	WP5	LP7	WP5	LP7	WP1WP3	LP7	WP1WP4	LP7	WP15
IGM-DU 88-783	l M1 or M2	1.82	1.69	La_Venta	Microscleromys cribriphilus	MW	W	W2	W	W2	W2	M2W2	W2	M1W2	M2W2	M1W2	LP2	WP1	LP3	WP1	LP3	WP1	LP4	WP1	LP5	WP5	LP5	WP5	LP6	WP5	LP9	WP6	LP9	WP6	LP10	WP6	LP11	WP1WP2	LP11	WP12	LP12	WP12	LP13	WP13
IGM-DU 89-673	l M1 or M2	1.74	1.72	La_Venta	Microscleromys cribriphilus	MW	W	W2	W	W2	W2	M2W2	W2	M1W2	M2W2	M1W2	LP2	WP1	LP3	WP1	LP3	WP1	LP3	WP1	LP4	WP5	LP4	WP5	LP5	WP5	LP5	WP6	LP5	WP6	LP5	WP6	LP7	WP6	LP7	WP6	LP7	WP6	LP7	WP6
