# Supplementary material for: Late middle Miocene caviomorph rodents from Tarapoto, Peruvian Amazonia
Source: PLoS One. 2021 Nov 3;16(11):e0258455. doi: 10.1371/journal.pone.0258455 (PMC8565788; doi:10.1371/journal.pone.0258455)
Supplement: S2 File — (ZIP) [file pone.0258455.s002.zip › S2_File/M1-2s/Script_M1-2s.txt]

install.packages("trend")
install.packages("RVAideMemoire")
install.packages("dunn.test")
install.packages("cluster")
library("trend")
library("RVAideMemoire")
library("dunn.test")
library("cluster")

setwd("E:/Recherche/Publis/Boivin&al,202X_TAR-31&La Venta/Stat/Tout/M1-2s")
micros<-read.table("Stat_M1-2s.txt", header=T, dec=",", sep= "\t")


TAR31<-micros[micros[,7]=="TAR-31",]
LV<-micros[micros[,7]=="La_Venta",]
Mp<-micros[micros[,8]=="Microscleromys paradoxalis" ,]
Mc<-micros[micros[,8]=="Microscleromys cribriphilus",]

summary(micros[,3])
summary(TAR31[,3])
summary(LV[,3])
summary(Mp[,3])
summary(Mc[,3])
summary(micros[,4])
summary(TAR31[,4])
summary(LV[,4])
summary(Mp[,4])
summary(Mc[,4])
var(micros[,3])
var(TAR31[,3])
var(LV[,3])
var(Mp[,3])
var(Mc[,3])
var(micros[,4])
var(TAR31[,4])
var(LV[,4])
var(Mp[,4])
var(Mc[,4])
sd(micros[,3])
sd(TAR31[,3])
sd(LV[,3])
sd(Mp[,3])
sd(Mc[,3])
sd(micros[,4])
sd(TAR31[,4])
sd(LV[,4])
sd(Mp[,4])
sd(Mc[,4])

stripchart(micros$len, vertical=T)
stripchart(micros$wid, vertical=T)
stripchart(micros$len~micros$Locality, vertical=T, names=c("TAR-31","La_Venta"))
stripchart(micros$wid~micros$Locality, vertical=T, names=c("TAR-31","La_Venta"))
stripchart(micros$len~micros$Species, vertical=T, names=c("Microscleromys","Microscleromys paradoxalis", "Microscleromys cribriphilus"))
stripchart(micros$wid~micros$Species, vertical=T, names=c("Microscleromys","Microscleromys paradoxalis", "Microscleromys cribriphilus"))
hist(micros$len, probability=F)
hist(micros$wid, probability=F)
boxplot(micros$len)
boxplot(micros$wid)
boxplot(micros$len~micros$Locality, labels=c("TAR-31","La_Venta"))
boxplot(micros$wid~micros$Locality, labels=c("TAR-31","La_Venta"))
boxplot(micros$len~micros$Species, labels=c("Microscleromys","Microscleromys paradoxalis", "Microscleromys cribriphilus"))
boxplot(micros$wid~micros$Species, labels=c("Microscleromys","Microscleromys paradoxalis", "Microscleromys cribriphilus"))
mlen31<-mean(micros$len[micros$Locality=="TAR-31"])
sdlen31<-sd(micros$len[micros$Locality=="TAR-31"])
mlenLV<-mean(micros$len[micros$Locality=="La_Venta"])
sdlenLV<-sd(micros$len[micros$Locality=="La_Venta"])
moylenGis<-c(mlen31, mlenLV)
sdlenGis<-c(sdlen31, sdlenLV)
abscisses<-barplot(moylenGis)
segments(abscisses,moylenGis-sdlenGis,abscisses,moylenGis+sdlenGis)
segments(abscisses-0.1,moylenGis-sdlenGis,abscisses+0.1,moylenGis-sdlenGis)
segments(abscisses-0.1,moylenGis+sdlenGis,abscisses+0.1,moylenGis+sdlenGis)
mwid31<-mean(micros$wid[micros$Locality=="TAR-31"])
sdwid31<-sd(micros$wid[micros$Locality=="TAR-31"])
mwidLV<-mean(micros$wid[micros$Locality=="La_Venta"])
sdwidLV<-sd(micros$wid[micros$Locality=="La_Venta"])
moywidGis<-c(mwid31, mwidLV)
sdwidGis<-c(sdwid31, sdwidLV)
abscisses<-barplot(moywidGis)
segments(abscisses,moywidGis-sdwidGis,abscisses,moywidGis+sdwidGis)
segments(abscisses-0.1,moywidGis-sdwidGis,abscisses+0.1,moywidGis-sdwidGis)
segments(abscisses-0.1,moywidGis+sdwidGis,abscisses+0.1,moywidGis+sdwidGis)
mlenMc<-mean(micros$len[micros$Species=="Microscleromys cribriphilus"])
mlenMp<-mean(micros$len[micros$Species=="Microscleromys paradoxalis"])
sdlenMp<-sd(micros$len[micros$Species=="Microscleromys paradoxalis"])
sdlenMc<-sd(micros$len[micros$Species=="Microscleromys cribriphilus"])
moylenSp<-c(mlen31, mlenMc, mlenMp)
sdlenSp<-c(sdlen31, sdlenMc, sdlenMp)
abscisses<-barplot(moylenSp)
segments(abscisses,moylenSp-sdlenSp,abscisses,moylenSp+sdlenSp)
segments(abscisses-0.1,moylenSp-sdlenSp,abscisses+0.1,moylenSp-sdlenSp)
segments(abscisses-0.1,moylenSp+sdlenSp,abscisses+0.1,moylenSp+sdlenSp)
mwidMp<-mean(micros$wid[micros$Species=="Microscleromys paradoxalis"])
mwidMc<-mean(micros$wid[micros$Species=="Microscleromys cribriphilus"])
sdwidMp<-sd(micros$wid[micros$Species=="Microscleromys paradoxalis"])
sdwidMc<-sd(micros$wid[micros$Species=="Microscleromys cribriphilus"])
moywidSp<-c(mwid31, mwidMc, mwidMp)
sdwidSp<-c(sdwid31, sdwidMc, sdwidMp)
abscisses<-barplot(moywidSp)
segments(abscisses,moywidSp-sdwidSp,abscisses,moywidSp+sdwidSp)
segments(abscisses-0.1,moywidSp-sdwidSp,abscisses+0.1,moywidSp-sdwidSp)
segments(abscisses-0.1,moywidSp+sdwidSp,abscisses+0.1,moywidSp+sdwidSp)
plot(micros[,3],micros[,4],pch=21,cex=2)
panel.smooth(micros[,3],micros[,4])
ColG<-c("blue","green")[as.factor(micros[,7])]
plot(micros[,3],micros[,4],pch=21,cex=2,bg=ColG)
ColS<-c("red","yellow","orange","white")[as.factor(micros[,8])]
plot(micros[,3],micros[,4],pch=21,cex=2,bg=ColS)

qqnorm(micros$len)
qqnorm(micros$len[micros$Locality=="TAR-31"])
qqnorm(micros$wid)
qqnorm(micros$wid[micros$Locality=="TAR-31"])
shapiro.test(micros$len)
shapiro.test(micros$len[micros$Locality=="TAR-31"])
shapiro.test(micros$len[micros$Locality=="La_Venta"])
shapiro.test(micros$wid)
shapiro.test(micros$wid[micros$Locality=="TAR-31"])
shapiro.test(micros$wid[micros$Locality=="La_Venta"])

var.test(micros$len~micros$Locality)
var.test(micros$wid~micros$Locality)
perm.var.test(micros$len[micros$Species=="Microscleromys"], micros$len[micros$Species=="Microscleromys cribriphilus"])
perm.var.test(micros$wid[micros$Species=="Microscleromys"], micros$wid[micros$Species=="Microscleromys cribriphilus"])

bartels.test(micros$len)
bartels.test(micros$len[micros$Locality=="TAR-31"])
bartels.test(micros$wid)
bartels.test(micros$wid[micros$Locality=="TAR-31"])
mk.test(micros$len, alternative = "two.sided", continuity = TRUE) 
mk.test(micros$len[micros$Locality=="TAR-31"], alternative = "two.sided", continuity = TRUE) 
mk.test(micros$len[micros$Locality=="La_Venta"], alternative = "two.sided", continuity = TRUE) 
mk.test(micros$wid, alternative = "two.sided", continuity = TRUE) 
mk.test(micros$wid[micros$Locality=="TAR-31"], alternative = "two.sided", continuity = TRUE) 
mk.test(micros$wid[micros$Locality=="La_Venta"], alternative = "two.sided", continuity = TRUE) 

cor.test(micros$len,micros$wid,method="pearson",use="pairwise.complete.obs")

t.test(micros$len~micros$Locality,var.equal=TRUE)
t.test(micros$wid~micros$Locality,var.equal=TRUE)
perm.t.test(micros$len[micros$Species=="Microscleromys cribriphilus"],micros$len[micros$Locality=="TAR-31"])
perm.t.test(micros$wid[micros$Species=="Microscleromys cribriphilus"],micros$wid[micros$Locality=="TAR-31"])

wilcox.test(micros$len[micros$Species=="Microscleromys paradoxalis"],micros$len[micros$Species=="Microscleromys cribriphilus"], alternative="two.sided")
wilcox.test(micros$len[micros$Species=="Microscleromys paradoxalis"],micros$len[micros$Locality=="TAR-31"], alternative="two.sided")
wilcox.test(micros$wid[micros$Species=="Microscleromys paradoxalis"],micros$wid[micros$Species=="Microscleromys cribriphilus"], alternative="two.sided")
wilcox.test(micros$wid[micros$Species=="Microscleromys paradoxalis"],micros$wid[micros$Locality=="TAR-31"], alternative="two.sided")

microsKrus<-read.table("Stat_M1-2s_fig2.txt", header=T, dec=",", sep= "\t")
kruskal.test(microsKrus$len~microsKrus$Species)
dunn.test(microsKrus$len,microsKrus$Species)
kruskal.test(microsKrus$wid~microsKrus$Species)
dunn.test(microsKrus$wid,microsKrus$Species)

ratio<-micros$len/micros$wid
micros1<-cbind(micros,ratio)
shapiro.test(micros1$ratio)
shapiro.test(micros1$ratio[micros1$Locality=="TAR-31"])
shapiro.test(micros1$ratio[micros1$Locality=="La_Venta"])
var.test(micros1$ratio~micros1$Locality)
perm.var.test(micros1$ratio[micros1$Species=="Microscleromys"], micros1$ratio[micros1$Species=="Microscleromys cribriphilus"])
bartels.test(micros1$ratio)
bartels.test(micros1$ratio[micros1$Locality=="TAR-31"])
mk.test(micros1$ratio, alternative = "two.sided", continuity = TRUE) 
mk.test(micros1$ratio[micros1$Locality=="TAR-31"], alternative = "two.sided", continuity = TRUE) 
mk.test(micros1$ratio[micros1$Locality=="La_Venta"], alternative = "two.sided", continuity = TRUE) 
t.test(micros1$ratio~micros1$Locality,var.equal=TRUE)
perm.t.test(micros1$ratio[micros1$Species=="Microscleromys cribriphilus"],micros1$ratio[micros1$Locality=="TAR-31"])
wilcox.test(micros1$ratio[micros1$Species=="Microscleromys paradoxalis"],micros1$ratio[micros1$Species=="Microscleromys cribriphilus"], alternative="two.sided")
wilcox.test(micros1$ratio[micros1$Species=="Microscleromys paradoxalis"],micros1$ratio[micros1$Locality=="TAR-31"], alternative="two.sided")
microsKrus1<-cbind(microsKrus,ratio)
kruskal.test(microsKrus1$ratio~microsKrus1$Species)
dunn.test(microsKrus1$ratio,microsKrus1$Species)

al<-vector(mode="numeric")
projlen<-micros$len
for(i in 2:30)
{ml<-kmeans(projlen,i)
al<-append(al,ml$betweenss)}
plot(2:30,al)
aw<-vector(mode="numeric")
projwid<-micros$wid
for(i in 2:30)
{mw<-kmeans(projwid,i)
aw<-append(aw,mw$betweenss)}
plot(2:30,aw)

projlen<-micros$len
projwid<-micros$wid
Dl<-dist(projlen, method="euclidian")
Dw<-dist(projwid, method="euclidian")
mod1lenk<-kmeans(projlen,2)
mod1widk<-kmeans(projwid,2)
microsMod<-cbind(micros,mod1lenk$cluster)
mod1lenp<-pam(Dl, 2)
mod1widp<-pam(Dw, 2)
microsMod<-cbind(microsMod,mod1lenp$clustering)
microsMod<-cbind(microsMod,mod1widk$cluster)
microsMod<-cbind(microsMod,mod1widp$clustering)
mod2lenk<-kmeans(projlen,3)
mod2widk<-kmeans(projwid,3)
microsMod<-cbind(microsMod,mod2lenk$cluster)
mod2lenp<-pam(Dl, 3)
mod2widp<-pam(Dw, 3)
microsMod<-cbind(microsMod,mod2lenp$clustering)
microsMod<-cbind(microsMod,mod2widk$cluster)
microsMod<-cbind(microsMod,mod2widp$clustering)
mod3lenk<-kmeans(projlen,4)
mod3widk<-kmeans(projwid,4)
microsMod<-cbind(microsMod,mod3lenk$cluster)
mod3lenp<-pam(Dl, 4)
mod3widp<-pam(Dw, 4)
microsMod<-cbind(microsMod,mod3lenp$clustering)
microsMod<-cbind(microsMod,mod3widk$cluster)
microsMod<-cbind(microsMod,mod3widp$clustering)
mod4lenk<-kmeans(projlen,5)
mod4widk<-kmeans(projwid,5)
microsMod<-cbind(microsMod,mod4lenk$cluster)
mod4lenp<-pam(Dl, 5)
mod4widp<-pam(Dw, 5)
microsMod<-cbind(microsMod,mod4lenp$clustering)
microsMod<-cbind(microsMod,mod4widk$cluster)
microsMod<-cbind(microsMod,mod4widp$clustering)
mod5lenk<-kmeans(projlen,6)
mod5widk<-kmeans(projwid,6)
microsMod<-cbind(microsMod,mod5lenk$cluster)
mod5lenp<-pam(Dl, 6)
mod5widp<-pam(Dw, 6)
microsMod<-cbind(microsMod,mod5lenp$clustering)
microsMod<-cbind(microsMod,mod5widk$cluster)
microsMod<-cbind(microsMod,mod5widp$clustering)
mod6lenk<-kmeans(projlen,7)
mod6widk<-kmeans(projwid,7)
microsMod<-cbind(microsMod,mod6lenk$cluster)
mod6lenp<-pam(Dl, 7)
mod6widp<-pam(Dw, 7)
microsMod<-cbind(microsMod,mod6lenp$clustering)
microsMod<-cbind(microsMod,mod6widk$cluster)
microsMod<-cbind(microsMod,mod6widp$clustering)
mod7lenk<-kmeans(projlen,8)
mod7widk<-kmeans(projwid,8)
microsMod<-cbind(microsMod,mod7lenk$cluster)
mod7lenp<-pam(Dl, 8)
mod7widp<-pam(Dw, 8)
microsMod<-cbind(microsMod,mod7lenp$clustering)
microsMod<-cbind(microsMod,mod7widk$cluster)
microsMod<-cbind(microsMod,mod7widp$clustering)
mod8lenk<-kmeans(projlen,9)
mod8widk<-kmeans(projwid,9)
microsMod<-cbind(microsMod,mod8lenk$cluster)
mod8lenp<-pam(Dl, 9)
mod8widp<-pam(Dw, 9)
microsMod<-cbind(microsMod,mod8lenp$clustering)
microsMod<-cbind(microsMod,mod8widk$cluster)
microsMod<-cbind(microsMod,mod8widp$clustering)
mod9lenk<-kmeans(projlen,10)
mod9widk<-kmeans(projwid,10)
microsMod<-cbind(microsMod,mod9lenk$cluster)
mod9lenp<-pam(Dl, 10)
mod9widp<-pam(Dw, 10)
microsMod<-cbind(microsMod,mod9lenp$clustering)
microsMod<-cbind(microsMod,mod9widk$cluster)
microsMod<-cbind(microsMod,mod9widp$clustering)
mod10lenk<-kmeans(projlen,11)
mod10widk<-kmeans(projwid,11)
microsMod<-cbind(microsMod,mod10lenk$cluster)
mod10lenp<-pam(Dl, 11)
mod10widp<-pam(Dw, 11)
microsMod<-cbind(microsMod,mod10lenp$clustering)
microsMod<-cbind(microsMod,mod10widk$cluster)
microsMod<-cbind(microsMod,mod10widp$clustering)
mod11lenk<-kmeans(projlen,12)
mod11widk<-kmeans(projwid,12)
microsMod<-cbind(microsMod,mod11lenk$cluster)
mod11lenp<-pam(Dl, 12)
mod11widp<-pam(Dw, 12)
microsMod<-cbind(microsMod,mod11lenp$clustering)
microsMod<-cbind(microsMod,mod11widk$cluster)
microsMod<-cbind(microsMod,mod11widp$clustering)
mod12lenk<-kmeans(projlen,13)
mod12widk<-kmeans(projwid,13)
microsMod<-cbind(microsMod,mod12lenk$cluster)
mod12lenp<-pam(Dl, 13)
mod12widp<-pam(Dw, 13)
microsMod<-cbind(microsMod,mod12lenp$clustering)
microsMod<-cbind(microsMod,mod12widk$cluster)
microsMod<-cbind(microsMod,mod12widp$clustering)
mod13lenk<-kmeans(projlen,14)
mod13widk<-kmeans(projwid,14)
microsMod<-cbind(microsMod,mod13lenk$cluster)
mod13lenp<-pam(Dl, 14)
mod13widp<-pam(Dw, 14)
microsMod<-cbind(microsMod,mod13lenp$clustering)
microsMod<-cbind(microsMod,mod13widk$cluster)
microsMod<-cbind(microsMod,mod13widp$clustering)
mod14lenk<-kmeans(projlen,15)
mod14widk<-kmeans(projwid,15)
microsMod<-cbind(microsMod,mod14lenk$cluster)
mod14lenp<-pam(Dl, 15)
mod14widp<-pam(Dw, 15)
microsMod<-cbind(microsMod,mod14lenp$clustering)
microsMod<-cbind(microsMod,mod14widk$cluster)
microsMod<-cbind(microsMod,mod14widp$clustering)
write.csv(microsMod, file="microsModPartition.txt")

setwd("E:/Recherche/Publis/Boivin&al,202X_TAR-31&La Venta/Stat/Tout/M1-2s/StatesWear")
micros<-read.table("Stat_M1-2s_reduced.txt", header=T, dec=",", sep= "\t")
al<-vector(mode="numeric")
projlen<-micros$len
for(i in 2:30)
{ml<-kmeans(projlen,i)
al<-append(al,ml$betweenss)}
plot(2:30,al)
aw<-vector(mode="numeric")
projwid<-micros$wid
for(i in 2:30)
{mw<-kmeans(projwid,i)
aw<-append(aw,mw$betweenss)}
plot(2:30,aw)


rm(list=ls()) 
install.packages("MASS")
library(MASS)
setwd("E:/Recherche/Publis/Boivin&al,202X_TAR-31&La Venta/Stat/Tout/M1-2s/Models")
med<-read.table("microsMod_M1-2s.txt", header=T, dec=",", sep= "\t")
head(med)
len=as.numeric(med$len)
wid=as.numeric(med$wid)
Mod1=as.factor(med$Mod1)
Mod2=as.factor(med$Mod2)
Mod3=as.factor(med$Mod3)
Mod4=as.factor(med$Mod4)
Mod5=as.factor(med$Mod5)
Mod6=as.factor(med$Mod6)
Mod7=as.factor(med$Mod7)
Mod8=as.factor(med$Mod8)
Mod9=as.factor(med$Mod9)
Mod10=as.factor(med$Mod10)
Mod11=as.factor(med$Mod11)
Mod12=as.factor(med$Mod12)
Mod13=as.factor(med$Mod13)
Mod14=as.factor(med$Mod14)
Mod15=as.factor(med$Mod15)
Mod16=as.factor(med$Mod16)
Mod17=as.factor(med$Mod17)
Mod18=as.factor(med$Mod18)
Mod19=as.factor(med$Mod19)
Mod20=as.factor(med$Mod20)
Mod21=as.factor(med$Mod21)
Mod22=as.factor(med$Mod22)
Mod23=as.factor(med$Mod23)
Mod24=as.factor(med$Mod24)
Mod25=as.factor(med$Mod25)
Mod26=as.factor(med$Mod26)
Mod27=as.factor(med$Mod27)
Mod28=as.factor(med$Mod28)
Mod29=as.factor(med$Mod29)
Mod30=as.factor(med$Mod30)
Mod31=as.factor(med$Mod31)
Mod32=as.factor(med$Mod32)
Mod33=as.factor(med$Mod33)
Mod34=as.factor(med$Mod34)
Mod35=as.factor(med$Mod35)
Mod36=as.factor(med$Mod36)
Mod37=as.factor(med$Mod37)
Mod38=as.factor(med$Mod38)
Mod39=as.factor(med$Mod39)
locality=as.factor(med$Locality)
med=data.frame(len,wid,Mod2,Mod3,Mod4,Mod5,Mod6,Mod7,Mod8,Mod9,Mod10,Mod11,Mod12,Mod13,Mod14,Mod15,Mod16,Mod17,Mod18,Mod19,Mod20,Mod21,Mod22,Mod23,Mod24,Mod25,Mod26,Mod27,Mod28,Mod29,Mod30,Mod31,Mod32,Mod33,Mod34,Mod35,Mod36,Mod37,Mod38,Mod39,locality)
str(med)
ml1 <- glm(len~1:locality, gaussian(link = "identity"), data=med)
ml2 <- glm(len~Mod2:locality,gaussian(link = "identity"), data=med)
ml3 <- glm(len~Mod3:locality,gaussian(link = "identity"), data=med)
ml4 <- glm(len~Mod4:locality,gaussian(link = "identity"), data=med)
ml5 <- glm(len~Mod5:locality,gaussian(link = "identity"), data=med)
ml6 <- glm(len~Mod6:locality,gaussian(link = "identity"), data=med)
ml7 <- glm(len~Mod7:locality,gaussian(link = "identity"),data=med)
ml8 <- glm(len~Mod8:locality,gaussian(link = "identity"), data=med)
ml9 <- glm(len~Mod9:locality,gaussian(link = "identity"), data=med)
ml10 <- glm(len~Mod10:locality,gaussian(link = "identity"), data=med)
ml11 <- glm(len~Mod11:locality,gaussian(link = "identity"), data=med)
ml12 <- glm(len~Mod12:locality,gaussian(link = "identity"), data=med)
ml13 <- glm(len~Mod13:locality,gaussian(link = "identity"), data=med)
ml14 <- glm(len~Mod14:locality,gaussian(link = "identity"), data=med)
ml15 <- glm(len~Mod15:locality,gaussian(link = "identity"), data=med)
ml16 <- glm(len~Mod16:locality,gaussian(link = "identity"), data=med)
ml17 <- glm(len~Mod17:locality,gaussian(link = "identity"), data=med)
ml18 <- glm(len~Mod18:locality,gaussian(link = "identity"), data=med)
ml19 <- glm(len~Mod19:locality,gaussian(link = "identity"), data=med)
ml20 <- glm(len~Mod20:locality,gaussian(link = "identity"), data=med)
ml21 <- glm(len~Mod21:locality,gaussian(link = "identity"), data=med)
ml22 <- glm(len~Mod22:locality,gaussian(link = "identity"), data=med)
ml23 <- glm(len~Mod23:locality,gaussian(link = "identity"), data=med)
ml24 <- glm(len~Mod24:locality, gaussian(link = "identity"), data=med)
ml25 <- glm(len~Mod25:locality,gaussian(link = "identity"), data=med)
ml26 <- glm(len~Mod26:locality,gaussian(link = "identity"), data=med)
ml27 <- glm(len~Mod27:locality,gaussian(link = "identity"), data=med)
ml28 <- glm(len~Mod28:locality,gaussian(link = "identity"), data=med)
ml29 <- glm(len~Mod29:locality,gaussian(link = "identity"), data=med)
ml30 <- glm(len~Mod30:locality,gaussian(link = "identity"),data=med)
ml31 <- glm(len~Mod31:locality,gaussian(link = "identity"), data=med)
ml32 <- glm(len~Mod32:locality,gaussian(link = "identity"), data=med)
ml33 <- glm(len~Mod33:locality,gaussian(link = "identity"), data=med)
ml34 <- glm(len~Mod34:locality,gaussian(link = "identity"), data=med)
ml35 <- glm(len~Mod35:locality,gaussian(link = "identity"), data=med)
ml36 <- glm(len~Mod36:locality,gaussian(link = "identity"), data=med)
ml37 <- glm(len~Mod37:locality,gaussian(link = "identity"), data=med)
ml38 <- glm(len~Mod38:locality,gaussian(link = "identity"), data=med)
ml39 <- glm(len~Mod39:locality,gaussian(link = "identity"), data=med)
aicc<-c(ml1$aic,ml2$aic,ml3$aic,ml4$aic,ml5$aic,ml6$aic,ml7$aic,ml8$aic,ml9$aic,ml10$aic,ml11$aic,ml12$aic,ml13$aic,ml14$aic,ml15$aic,ml16$aic,ml17$aic,ml18$aic,ml19$aic,ml20$aic,ml21$aic,ml22$aic,ml23$aic,ml24$aic,ml25$aic,ml26$aic,ml27$aic,ml28$aic,ml29$aic,ml30$aic,ml31$aic,ml32$aic,ml33$aic,ml34$aic,ml35$aic,ml36$aic,ml37$aic,ml38$aic,ml39$aic)
aiccD<-aicc-min(aicc)
aw<-exp(-0.5*aiccD)
aiccW<-aw/sum(aw)
aiccW
x<-cbind(aicc,aiccD,aiccW)
x<-data.frame(x)
write.table(x, 'AIClen_M1-2s.txt',sep = ,row.names=TRUE, col.names=TRUE)
res <- aov(ml38)
summary(ml38)
summary(res)
ml1 <- glm(wid~1:locality, gaussian(link = "identity"), data=med)
ml2 <- glm(wid~Mod2:locality,gaussian(link = "identity"), data=med)
ml3 <- glm(wid~Mod3:locality,gaussian(link = "identity"), data=med)
ml4 <- glm(wid~Mod4:locality,gaussian(link = "identity"), data=med)
ml5 <- glm(wid~Mod5:locality,gaussian(link = "identity"), data=med)
ml6 <- glm(wid~Mod6:locality,gaussian(link = "identity"), data=med)
ml7 <- glm(wid~Mod7:locality,gaussian(link = "identity"), data=med)
ml8 <- glm(wid~Mod8:locality,gaussian(link = "identity"), data=med)
ml9 <- glm(wid~Mod9:locality,gaussian(link = "identity"), data=med)
ml10 <- glm(wid~Mod10:locality,gaussian(link = "identity"), data=med)
ml11 <- glm(wid~Mod11:locality,gaussian(link = "identity"), data=med)
ml12 <- glm(wid~Mod12:locality,gaussian(link = "identity"), data=med)
ml13 <- glm(wid~Mod13:locality,gaussian(link = "identity"), data=med)
ml14 <- glm(wid~Mod14:locality,gaussian(link = "identity"), data=med)
ml15 <- glm(wid~Mod15:locality,gaussian(link = "identity"), data=med)
ml16 <- glm(wid~Mod16:locality,gaussian(link = "identity"), data=med)
ml17 <- glm(wid~Mod17:locality,gaussian(link = "identity"), data=med)
ml18 <- glm(wid~Mod18:locality,gaussian(link = "identity"), data=med)
ml19 <- glm(wid~Mod19:locality,gaussian(link = "identity"), data=med)
ml20 <- glm(wid~Mod20:locality,gaussian(link = "identity"), data=med)
ml21 <- glm(wid~Mod21:locality,gaussian(link = "identity"), data=med)
ml22 <- glm(wid~Mod22:locality,gaussian(link = "identity"),data=med)
ml23 <- glm(wid~Mod23:locality,gaussian(link = "identity"),data=med)
ml24 <- glm(wid~Mod24:locality, gaussian(link = "identity"), data=med)
ml25 <- glm(wid~Mod25:locality,gaussian(link = "identity"), data=med)
ml26 <- glm(wid~Mod26:locality,gaussian(link = "identity"), data=med)
ml27 <- glm(wid~Mod27:locality,gaussian(link = "identity"), data=med)
ml28 <- glm(wid~Mod28:locality,gaussian(link = "identity"), data=med)
ml29 <- glm(wid~Mod29:locality,gaussian(link = "identity"), data=med)
ml30 <- glm(wid~Mod30:locality,gaussian(link = "identity"),data=med)
ml31 <- glm(wid~Mod31:locality,gaussian(link = "identity"), data=med)
ml32 <- glm(wid~Mod32:locality,gaussian(link = "identity"), data=med)
ml33 <- glm(wid~Mod33:locality,gaussian(link = "identity"), data=med)
ml34 <- glm(wid~Mod34:locality,gaussian(link = "identity"), data=med)
ml35 <- glm(wid~Mod35:locality,gaussian(link = "identity"), data=med)
ml36 <- glm(wid~Mod36:locality,gaussian(link = "identity"), data=med)
ml37 <- glm(wid~Mod37:locality,gaussian(link = "identity"), data=med)
ml38 <- glm(wid~Mod38:locality,gaussian(link = "identity"), data=med)
ml39 <- glm(wid~Mod39:locality,gaussian(link = "identity"), data=med)
aicc<-c(ml1$aic,ml2$aic,ml3$aic,ml4$aic,ml5$aic,ml6$aic,ml7$aic,ml8$aic,ml9$aic,ml10$aic,ml11$aic,ml12$aic,ml13$aic,ml14$aic,ml15$aic,ml16$aic,ml17$aic,ml18$aic,ml19$aic,ml20$aic,ml21$aic,ml22$aic,ml23$aic,ml24$aic,ml25$aic,ml26$aic,ml27$aic,ml28$aic,ml29$aic,ml30$aic,ml31$aic,ml32$aic,ml33$aic,ml34$aic,ml35$aic,ml36$aic,ml37$aic,ml38$aic,ml39$aic)
aiccD<-aicc-min(aicc)
aw<-exp(-0.5*aiccD)
aiccW<-aw/sum(aw)
aiccW
x<-cbind(aicc,aiccD,aiccW)
x<-data.frame(x)
write.table(x, 'AICwid_M1-2s.txt',sep = ,row.names=TRUE, col.names=TRUE)
res <- aov(ml39)
summary(ml39)
summary(res)
