# Supplementary material for: Late middle Miocene caviomorph rodents from Tarapoto, Peruvian Amazonia
Source: PLoS One. 2021 Nov 3;16(11):e0258455. doi: 10.1371/journal.pone.0258455 (PMC8565788; doi:10.1371/journal.pone.0258455)
Supplement: S2 File — (ZIP) [file pone.0258455.s002.zip › S2_File/M1-2s/Stat_M1-2s.txt]

Numero	Loci	len	wid	Hlin	Hlab	Locality	Species
no number (among P4)	l M1 or M2?	1,41	1,648	NA	NA	TAR-31	Microscleromys
59	l M1 or M2?	1,557	1,554	NA	NA	TAR-31	Microscleromys
61	l M1 or M2?	1,608	1,553	NA	NA	TAR-31	Microscleromys
62	l M1 or M2?	1,678	1,46	1,214	0,87	TAR-31	Microscleromys
69	l M1 or M2?	1,709	1,544	1,409	0,722	TAR-31	Microscleromys
70	l M1 or M2?	1,611	1,66	1,151	0,705	TAR-31	Microscleromys
71	l M1 or M2?	1,71	1,589	NA	NA	TAR-31	Microscleromys
72	l M2?	1,875	1,807	NA	NA	TAR-31	Microscleromys
73	l M2?	1,725	1,715	NA	NA	TAR-31	Microscleromys
74	l M2?	1,717	1,742	NA	NA	TAR-31	Microscleromys
76	l M1 or M2?	1,499	1,339	1,277	0,774	TAR-31	Microscleromys
78	l M1 or M2?	1,455	1,613	NA	NA	TAR-31	Microscleromys
79	l M1 or M2?	1,5	1,311	1,396	0,778	TAR-31	Microscleromys
80	l M1 or M2?	1,371	1,411	NA	NA	TAR-31	Microscleromys
81	l M1 or M2?	1,521	1,58	1,548	0,841	TAR-31	Microscleromys
84	l M1 or M2?	1,562	1,511	1,318	0,785	TAR-31	Microscleromys
85	l M1 or M2?	1,473	1,702	1,24	0,757	TAR-31	Microscleromys
86	l M1 or M2?	1,671	1,568	NA	NA	TAR-31	Microscleromys
87	l M1 or M2?	1,576	1,444	NA	NA	TAR-31	Microscleromys
88	l M1 or M2?	1,653	1,508	NA	NA	TAR-31	Microscleromys
89	l M1 or M2?	1,573	1,486	NA	NA	TAR-31	Microscleromys
92	l M1 or M2?	1,356	1,356	NA	NA	TAR-31	Microscleromys
102	r M1 or M2?	1,356	1,442	NA	NA	TAR-31	Microscleromys
104	r M1 or M2?	1,594	1,376	NA	NA	TAR-31	Microscleromys
110	r M1 or M2?	1,595	1,424	NA	NA	TAR-31	Microscleromys
111	r M1 or M2?	1,463	1,554	1,349	0,794	TAR-31	Microscleromys
112	r M1 or M2?	1,636	1,579	1,351	0,913	TAR-31	Microscleromys
113	r M1 or M2?	1,61	1,687	NA	NA	TAR-31	Microscleromys
114	r M1 or M2?	1,714	1,534	NA	NA	TAR-31	Microscleromys
115	r M1 or M2?	1,829	1,539	1,338	0,932	TAR-31	Microscleromys
116	r M1 or M2?	1,702	1,637	NA	NA	TAR-31	Microscleromys
117	r M1 or M2?	1,348	1,275	1,143	0,735	TAR-31	Microscleromys
121	r M1 or M2?	1,514	1,514	NA	NA	TAR-31	Microscleromys
122	r M1 or M2?	1,496	1,287	1,269	0,752	TAR-31	Microscleromys
123	r M1 or M2?	1,363	1,352	NA	NA	TAR-31	Microscleromys
124	r M1 or M2?	1,373	1,355	NA	NA	TAR-31	Microscleromys
125	r M1 or M2?	1,437	1,448	1,351	0,854	TAR-31	Microscleromys
126	r M1 or M2?	1,295	1,416	NA	NA	TAR-31	Microscleromys
127	r M1 or M2?	1,504	1,615	NA	NA	TAR-31	Microscleromys
128	r M	1,381	1,548	NA	NA	TAR-31	Microscleromys
225	r M1 or M2?	1,919	1,782	NA	NA	TAR-31	Microscleromys
IGM-DU 88-821	r M1 or M2	1,76	1,78	NA	NA	La_Venta	Microscleromys paradoxalis
IGM-DU 88-783	l M1 or M2	1,82	1,69	NA	NA	La_Venta	Microscleromys cribriphilus
IGM-DU 89-673	l M1 or M2	1,74	1,72	NA	NA	La_Venta	Microscleromys cribriphilus
