# Supplementary material for: Late middle Miocene caviomorph rodents from Tarapoto, Peruvian Amazonia
Source: PLoS One. 2021 Nov 3;16(11):e0258455. doi: 10.1371/journal.pone.0258455 (PMC8565788; doi:10.1371/journal.pone.0258455)
Supplement: S2 File — (ZIP) [file pone.0258455.s002.zip › S2_File/m3/Stat_m3.txt]

Numero	Loci	len	wid	Hlin	Hlab	Locality	Species
161	l m3	1,392	1,221	0,982	1,052	TAR-31	Microscleromys
163	l m3	1,592	1,357	NA	NA	TAR-31	Microscleromys
167	l m3	1,713	1,29	0,969	0,993	TAR-31	Microscleromys
179	l m3	1,082	1,069	0,85	0,984	TAR-31	Microscleromys
181	l m3	1,52	1,247	NA	NA	TAR-31	Microscleromys
208	r m3	1,453	1,277	NA	NA	TAR-31	Microscleromys
IGM-DU 88-774	l m3	1,85	1,49	NA	NA	La_Venta	Microscleromys cribriphilus
IGM-DU 88-785	l m3	1,9	1,44	NA	NA	La_Venta	Microscleromys cribriphilus
IGM-DU 88-804	l m3	1,79	1,44	NA	NA	La_Venta	Microscleromys cribriphilus
IGM 251020	r m3	1,1	1,5	NA	NA	La_Venta	Microscleromys cribriphilus
IGM-DU 89-674	r m3	1,78	1,3	NA	NA	La_Venta	Microscleromys ?paradoxalis
