# Supplementary material for: Late middle Miocene caviomorph rodents from Tarapoto, Peruvian Amazonia
Source: PLoS One. 2021 Nov 3;16(11):e0258455. doi: 10.1371/journal.pone.0258455 (PMC8565788; doi:10.1371/journal.pone.0258455)
Supplement: S2 File — (ZIP) [file pone.0258455.s002.zip › S2_File/M3s/Stat_M3s.txt]

Numero	Loci	len	wid	Hlin	Hlab	Locality	Species
44	r M3?	1,201	1,127	1,125	0,77	TAR-31	Microscleromys
49	r M3?	1,443	1,07	NA	NA	TAR-31	Microscleromys
60	l M3?	1,377	1,361	NA	NA	TAR-31	Microscleromys
63	l M3?	1,169	1,309	NA	NA	TAR-31	Microscleromys
66	l M3?	1,349	1,495	NA	NA	TAR-31	Microscleromys
68	l M3?	1,525	1,484	1,518	0,844	TAR-31	Microscleromys
75	l M3?	1,275	1,359	1,277	0,768	TAR-31	Microscleromys
77	l M3?	1,372	1,315	NA	NA	TAR-31	Microscleromys
83	l M3?	1,285	1,387	NA	NA	TAR-31	Microscleromys
91	l M3?	1,415	1,439	NA	NA	TAR-31	Microscleromys
98	r M3?	1,246	1,29	1,329	0,807	TAR-31	Microscleromys
99	r M3?	1,292	1,449	NA	NA	TAR-31	Microscleromys
105	r M3?	1,299	1,401	1,195	0,666	TAR-31	Microscleromys
106	r M3?	1,319	1,325	NA	NA	TAR-31	Microscleromys
107	r M3?	1,261	1,308	NA	NA	TAR-31	Microscleromys
118	r M3?	1,42	1,491	NA	NA	TAR-31	Microscleromys
119	r M3?	1,429	1,538	NA	NA	TAR-31	Microscleromys
IGM-DU 85-410	r M3	1,63	1,66	NA	NA	La_Venta	Microscleromys paradoxalis
IGM-DU 88-784	l M3	1,49	1,64	NA	NA	La_Venta	Microscleromys cribriphilus
