# Supplementary material for: Late middle Miocene caviomorph rodents from Tarapoto, Peruvian Amazonia
Source: PLoS One. 2021 Nov 3;16(11):e0258455. doi: 10.1371/journal.pone.0258455 (PMC8565788; doi:10.1371/journal.pone.0258455)
Supplement: S2 File — (ZIP) [file pone.0258455.s002.zip › S2_File/p4/Models/microsMod_p4.txt]

Numero	len	wid	Locality	Species		Mod1	Mod2	Mod3	Mod4	Mod5	Mod6	Mod7	Mod8	Mod9	Mod10	Mod11	Mod12	Mod13	Mod14	Mod15	Mod16	Mod17	Mod18	Mod19	Mod20	Mod21	Mod22	Mod23	Mod24	Mod25	Mod26	Mod27	Mod28	Mod29	Mod30	Mod31	Mod32	Mod33	Mod34	Mod35	Mod36	Mod37	Mod38	Mod39	Mod40	Mod41	Mod42	Mod43	Mod44	Mod45	Mod46	Mod47	Mod48	Mod49	Mod50	Mod51
146	1.481	1.481	TAR-31	Microscleromys		MW	M	M	M	M	M	M1	M1	M1	M1	M1	M1	M1	M1	M1W2W3	M1W1W3	M1W1W2	M1W1W3	M1W1	M1W2W3	M1W2	M1W1W2	M1W3	LP1	WP1	LP1	WP1	LP1	WP1	LP1	WP1	LP1	WP1	LP1	WP1	LP1	WP1	LP1	WP1	LP1	WP1	LP2	WP3	LP4	WP5	LP6	WP7	LP8	WP9	LP10	WP11
147	1.655	1.459	TAR-31	Microscleromys		MW	M	M	M	M	M	M1	M1	M1	M1	M1	M1	M1	M1	M1W2W3	M1W1W3	M1W1W2	M1W1W3	M1W1	M1W2W3	M1W2	M1W1W2	M1W3	LP1	WP1	LP2	WP1	LP2	WP1	LP2	WP1	LP2	WP2	LP2	WP2	LP2	WP2	LP2	WP2	LP2	WP2	LP2	WP2	LP3	WP4	LP5	WP6	LP7	WP8	LP9	WP10
148	1.615	1.529	TAR-31	Microscleromys		MW	M	M	M	M	M	M1	M1	M1	M1	M1	M1	M1	M1	M1W2W3	M1W1W3	M1W1W2	M1W1W3	M1W1	M1W2W3	M1W2	M1W1W2	M1W3	LP1	WP1	LP1	WP1	LP2	WP1	LP2	WP1	LP2	WP1	LP3	WP1	LP3	WP3	LP3	WP3	LP3	WP3	LP3	WP3	LP3	WP3	LP4	WP5	LP6	WP7	LP8	WP9
149	1.696	1.477	TAR-31	Microscleromys		MW	M	M	M	M	M	M2	M2	M2	M2	M2	M2W2W3	M2W1W3	M2W1W2	M2	M2	M2	M2W2	M2W2W3	M2W1	M2W1W3	M2W3	M2W1W2	LP1	WP1	LP2	WP1	LP2	WP1	LP2	WP1	LP2	WP1	LP2	WP1	LP2	WP1	LP2	WP1	LP2	WP1	LP4	WP1	LP4	WP1	LP4	WP1	LP4	WP1	LP4	WP1
151	1.529	1.292	TAR-31	Microscleromys		MW	M	M	M	M	M	M1	M1	M1	M1	M1	M1	M1	M1	M1W2W3	M1W1W3	M1W1W2	M1W1W3	M1W1	M1W2W3	M1W2	M1W1W2	M1W3	LP1	WP1	LP1	WP2	LP1	WP2	LP1	WP2	LP1	WP3	LP1	WP3	LP1	WP4	LP4	WP4	LP4	WP4	LP5	WP4	LP5	WP4	LP5	WP4	LP5	WP4	LP5	WP4
152	1.527	1.243	TAR-31	Microscleromys		MW	M	M	M	M	M	M1	M1	M1	M1	M1	M1	M1	M1	M1W2W3	M1W1W3	M1W1W2	M1W1W3	M1W1	M1W2W3	M1W2	M1W1W2	M1W3	LP1	WP1	LP1	WP2	LP1	WP2	LP1	WP2	LP1	WP3	LP1	WP3	LP1	WP4	LP4	WP4	LP4	WP5	LP5	WP5	LP5	WP5	LP5	WP5	LP5	WP5	LP5	WP5
153	1.685	1.342	TAR-31	Microscleromys		MW	M	M	M	M	M	M2	M2	M2	M2	M2	M2W2W3	M2W1W3	M2W1W2	M2	M2	M2	M2W2	M2W2W3	M2W1	M2W1W3	M2W3	M2W1W2	LP1	WP1	LP2	WP2	LP2	WP2	LP2	WP2	LP2	WP3	LP2	WP3	LP2	WP4	LP2	WP5	LP2	WP6	LP4	WP6	LP6	WP6	LP6	WP6	LP6	WP6	LP6	WP6
154	1.759	1.431	TAR-31	Microscleromys		MW	M	M	M	M	M	M2	M2	M2	M2	M2	M2W2W3	M2W1W3	M2W1W2	M2	M2	M2	M2W2	M2W2W3	M2W1	M2W1W3	M2W3	M2W1W2	LP2	WP1	LP2	WP1	LP3	WP1	LP3	WP1	LP3	WP2	LP4	WP2	LP4	WP2	LP5	WP2	LP5	WP2	LP6	WP2	LP7	WP7	LP7	WP7	LP7	WP7	LP7	WP7
155	1.752	1.544	TAR-31	Microscleromys		MW	M	M	M	M	M	M2	M2	M2	M2	M2	M2W2W3	M2W1W3	M2W1W2	M2	M2	M2	M2W2	M2W2W3	M2W1	M2W1W3	M2W3	M2W1W2	LP2	WP1	LP2	WP1	LP3	WP1	LP3	WP1	LP3	WP1	LP4	WP1	LP4	WP3	LP5	WP3	LP5	WP3	LP6	WP3	LP7	WP3	LP7	WP8	LP7	WP8	LP7	WP8
156	1.832	1.488	TAR-31	Microscleromys		MW	M	M	M	M	M	M2	M2	M2	M2	M2	M2W2W3	M2W1W3	M2W1W2	M2	M2	M2	M2W2	M2W2W3	M2W1	M2W1W3	M2W3	M2W1W2	LP2	WP1	LP2	WP1	LP3	WP1	LP4	WP1	LP4	WP1	LP5	WP1	LP5	WP1	LP6	WP1	LP6	WP1	LP7	WP1	LP8	WP1	LP8	WP1	LP8	WP9	LP8	WP9
157	1.676	1.442	TAR-31	Microscleromys		MW	M	M	M	M	M	M2	M2	M2	M2	M2	M2W2W3	M2W1W3	M2W1W2	M2	M2	M2	M2W2	M2W2W3	M2W1	M2W1W3	M2W3	M2W1W2	LP1	WP1	LP2	WP1	LP2	WP1	LP2	WP1	LP2	WP2	LP2	WP2	LP2	WP2	LP2	WP2	LP2	WP2	LP4	WP2	LP6	WP7	LP6	WP7	LP6	WP7	LP9	WP10
IGM-DU 88-808*	2.07	1.95	La_Venta	Microscleromys paradoxalis		MW	W	W1W3	W1	W1W2	W1	W	W1W3	W1	W1W2	W1	W1	M2W1W3	M2W1W2	W1	M1W1W3	M1W1W2	M1W1W3	M1W1	M2W1	M2W1W3	M1W1W2	M2W1W2	LP2	WP2	LP3	WP3	LP4	WP3	LP5	WP3	LP5	WP4	LP6	WP4	LP6	WP5	LP7	WP6	LP7	WP7	LP8	WP7	LP9	WP8	LP9	WP9	LP9	WP10	LP10	WP11
IGM-DU 88-805	2	1.71	La_Venta	Microscleromys paradoxalis		MW	W	W1W3	W1	W1W2	W1	W	W1W3	W1	W1W2	W1	W1	M2W1W3	M2W1W2	W1	M1W1W3	M1W1W2	M1W1W3	M1W1	M2W1	M2W1W3	M1W1W2	M2W1W2	LP2	WP2	LP3	WP3	LP4	WP4	LP5	WP4	LP6	WP5	LP7	WP5	LP7	WP6	LP8	WP7	LP8	WP8	LP9	WP8	LP10	WP9	LP10	WP10	LP10	WP11	LP11	WP12
IGM-DU 88-806	1.95	1.63	La_Venta	Microscleromys paradoxalis		MW	W	W1W3	W1	W1W2	W1	W	W1W3	W1	W1W2	W1	W1	M2W1W3	M2W1W2	W1	M1W1W3	M1W1W2	M1W1W3	M1W1	M2W1	M2W1W3	M1W1W2	M2W1W2	LP2	WP1	LP3	WP1	LP4	WP4	LP5	WP4	LP6	WP5	LP7	WP6	LP8	WP7	LP9	WP8	LP9	WP9	LP10	WP9	LP11	WP10	LP11	WP11	LP11	WP12	LP12	WP13
IGM-DU 88-672	1.82	1.59	La_Venta	Microscleromys cribriphilus		MW	W	W2	W2W3	W1W2	W2	W	W2	W2W3	W1W2	W2	M2W2W3	W2	M2W1W2	M1W2W3	W2	M1W1W2	M2W2	M2W2W3	M1W2W3	M1W2	M1W1W2	M2W1W2	LP2	WP1	LP2	WP1	LP3	WP4	LP4	WP4	LP4	WP5	LP5	WP6	LP5	WP7	LP6	WP8	LP6	WP9	LP7	WP10	LP8	WP11	LP12	WP12	LP12	WP13	LP13	WP14
IGM-DU 88-818	1.79	1.62	La_Venta	Microscleromys cribriphilus		MW	W	W2	W2W3	W1W2	W2	W	W2	W2W3	W1W2	W2	M2W2W3	W2	M2W1W2	M1W2W3	W2	M1W1W2	M2W2	M2W2W3	M1W2W3	M1W2	M1W1W2	M2W1W2	LP2	WP1	LP2	WP1	LP3	WP4	LP4	WP4	LP4	WP5	LP5	WP6	LP5	WP7	LP6	WP8	LP10	WP9	LP11	WP9	LP12	WP10	LP13	WP11	LP13	WP12	LP14	WP13
ING-KU 8604	1.8	1.83	La_Venta	Microscleromys sp.		MW	W	W1W3	W2W3	W3	W3	W	W1W3	W2W3	W3	W3	M2W2W3	M2W1W3	W3	M1W2W3	M1W1W3	W3	M1W1W3	M2W2W3	M1W2W3	M2W1W3	M2W3	M1W3	LP2	WP2	LP2	WP3	LP3	WP3	LP4	WP5	LP4	WP6	LP5	WP7	LP5	WP8	LP6	WP9	LP10	WP10	LP11	WP11	LP12	WP12	LP13	WP13	LP14	WP14	LP15	WP15
