# Supplementary material for: Late middle Miocene caviomorph rodents from Tarapoto, Peruvian Amazonia
Source: PLoS One. 2021 Nov 3;16(11):e0258455. doi: 10.1371/journal.pone.0258455 (PMC8565788; doi:10.1371/journal.pone.0258455)
Supplement: S2 File — (ZIP) [file pone.0258455.s002.zip › S2_File/p4/StatesWear/Stat_p4_reduced.txt]

Numero	Loci	len	wid	Hlin	Hlab	Locality	Species
147	l p4	1,655	1,459	NA	NA	TAR-31	Microscleromys
149	l p4	1,696	1,477	1,03	1,156	TAR-31	Microscleromys
151	r p4	1,529	1,292	0,976	1,006	TAR-31	Microscleromys
154	r p4	1,759	1,431	0,796	0,978	TAR-31	Microscleromys
156	r p4	1,832	1,488	1,208	0,995	TAR-31	Microscleromys
157	r p4	1,676	1,442	NA	NA	TAR-31	Microscleromys
IGM-DU 88-808*	r p4	2,07	1,95	NA	NA	La_Venta	Microscleromys paradoxalis
IGM-DU 88-805	r p4	2	1,71	NA	NA	La_Venta	Microscleromys paradoxalis
IGM-DU 88-806	l p4	1,95	1,63	NA	NA	La_Venta	Microscleromys paradoxalis
IGM-DU 88-672	r p4	1,82	1,59	NA	NA	La_Venta	Microscleromys cribriphilus
IGM-DU 88-818	l p4	1,79	1,62	NA	NA	La_Venta	Microscleromys cribriphilus
ING-KU 8604	r p4	1,8	1,83	NA	NA	La_Venta	Microscleromys sp.
