# Supplementary material for: Late middle Miocene caviomorph rodents from Tarapoto, Peruvian Amazonia
Source: PLoS One. 2021 Nov 3;16(11):e0258455. doi: 10.1371/journal.pone.0258455 (PMC8565788; doi:10.1371/journal.pone.0258455)
Supplement: S2 File — (ZIP) [file pone.0258455.s002.zip › S2_File/P4s/Stat_P4s.txt]

Numero	Loci	len	wid	Hlin	Hlab	Locality	Species
34	l P4	1,507	1,542	1,362	0,737	TAR-31	Microscleromys
35	l P4	1,48	1,537	1,412	0,672	TAR-31	Microscleromys
36	l P4	1,54	1,698	1,481	1,212	TAR-31	Microscleromys
37	l P4	1,509	1,512	NA	NA	TAR-31	Microscleromys
38	l P4	1,516	1,778	1,223	0,883	TAR-31	Microscleromys
39	l P4	1,475	1,771	NA	NA	TAR-31	Microscleromys
40	l P4	1,581	1,991	1,375	0,982	TAR-31	Microscleromys
41	l P4	1,522	1,795	NA	NA	TAR-31	Microscleromys
42	l P4	1,41	1,634	NA	NA	TAR-31	Microscleromys
46	r P4	1,279	1,42	NA	NA	TAR-31	Microscleromys
47	r P4	1,163	1,308	NA	NA	TAR-31	Microscleromys
48	r P4	1,561	1,699	NA	NA	TAR-31	Microscleromys
50	r P4	1,574	1,769	NA	NA	TAR-31	Microscleromys
51	r P4	1,537	1,748	NA	NA	TAR-31	Microscleromys
52	r P4	1,556	2,238	1,238	1,082	TAR-31	Microscleromys
53	r P4	1,587	1,69	1,416	1,093	TAR-31	Microscleromys
54	r P4	1,398	1,423	NA	NA	TAR-31	Microscleromys
55	r P4	1,368	1,642	NA	NA	TAR-31	Microscleromys
IGM 251040	r P4	1,2	1,5	NA	NA	La_Venta	Microscleromys paradoxalis
UNC no number	left P4	4	5,1	NA	NA	La_Venta	Microscleromys ?paradoxalis
IGM-DU 85-411	"left M1 or M2 by W; NO left P4"	3,7	4,9	NA	NA	La_Venta	Microscleromys ?paradoxalis
